# Supplementary material for: Densities and numbers of calbindin and parvalbumin positive neurons across the rat and mouse brain
Source: PubMed Central journal article supplement (PMC7770605; doi:10.1016/j.isci.2020.101906), 2020-12-08
Supplement: mmc1.pdf [file mmc1.pdf]

**iScience, Volume 24**

**Supplemental Information**

**Densities and numbers of calbindin  
and parvalbumin positive neurons  
across the rat and mouse brain**

**Ingvild E. Bjerke, Sharon C. Yates, Arthur Laja, Menno P. Witter, Maja A. Puchades, Jan G. Bjaalie, and Trygve B. Leergaard**

**Supplemental Figure 1. Comparison of manual and QUINT counts of parvalbumin positive profiles across the medial entorhinal cortex. Related to Transparent Methods, “Validity of segmentations”.**

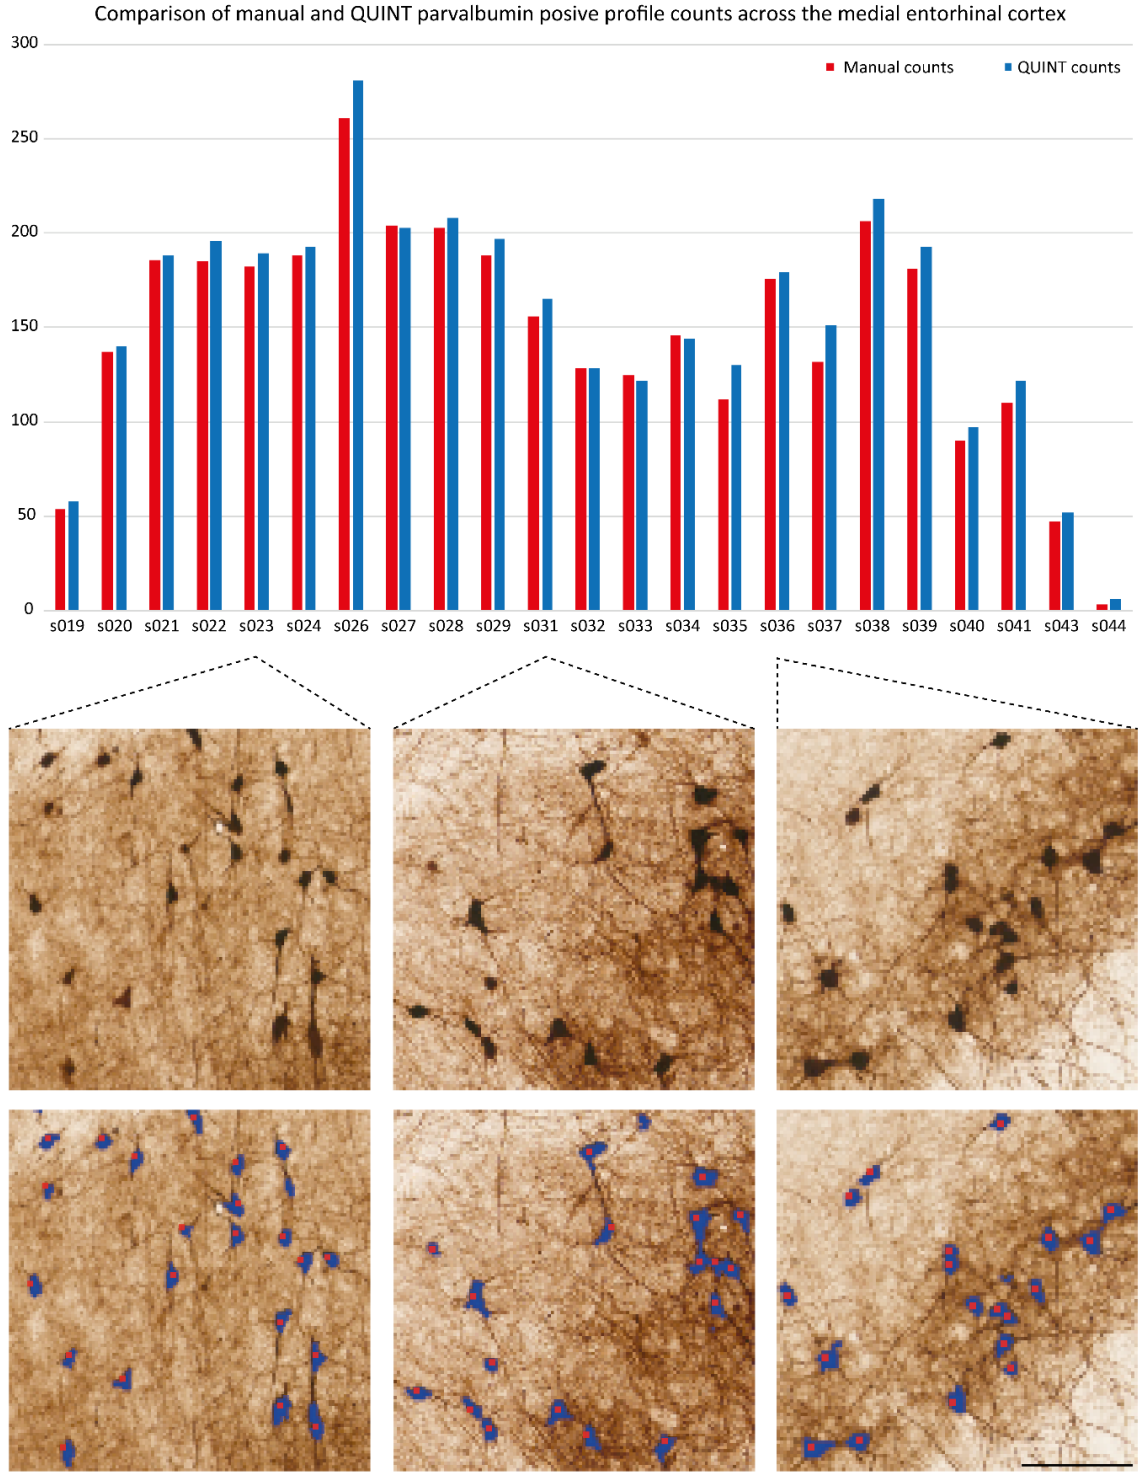

The graph shows manual counts (red bars) and QUINT counts (blue bars) from horizontal sections throughout the medial entorhinal cortex. Bottom row shows example of manual and ilastik segmentations overlaid to the parvalbumin stained material. Scale bar: 100 μm.

**Supplemental Figure 2. Reliability of segmentations from one researcher. Related to Transparent Methods, “Reliability of segmentations”.**

Regional variation in segmentations made by one researcher

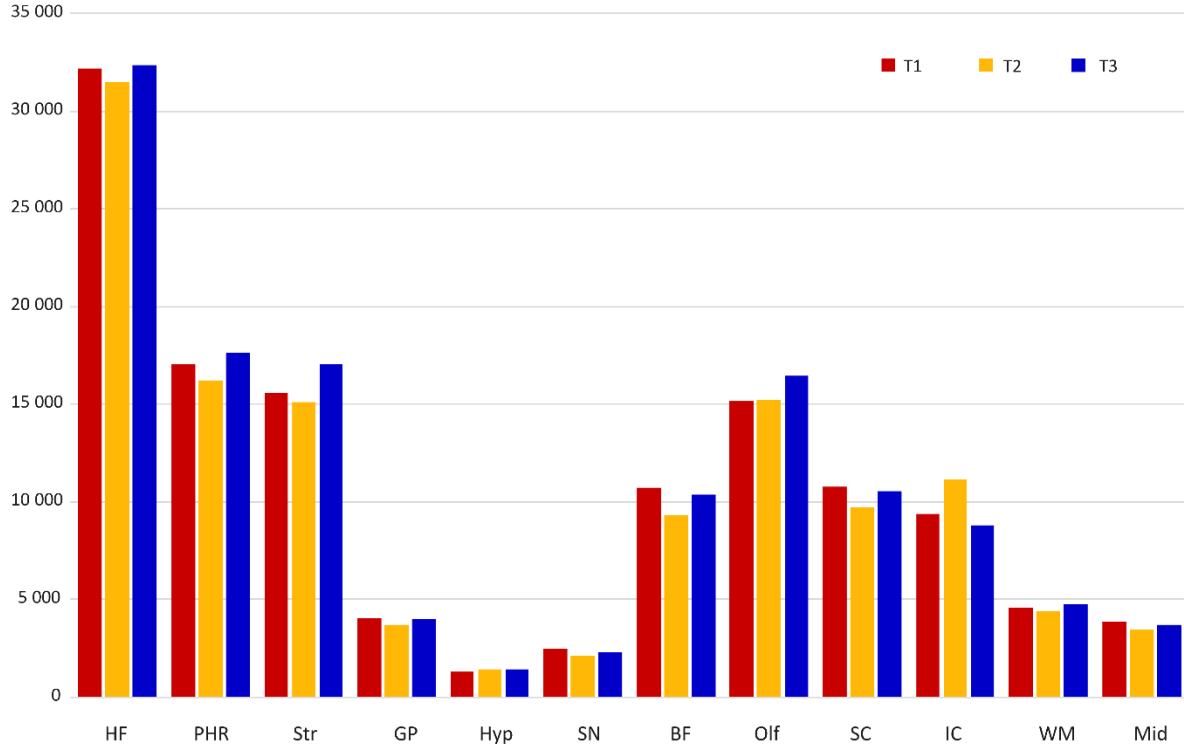

Bar chart showing the results from quantification of segmentations made by one researcher at three different time points (T1-3). Abbreviations: BF, basal forebrain; GP, globus pallidus; HF, hippocampal formation; Hyp, hypothalamus; IC, inferior colliculus; PHR, parahippocampal region; Mid, other midbrain regions Str, striatum; SN, substantia nigra; Olf, olfactory regions; SC, superior colliculus; WM, white matter. A list of which regions of the Waxholm Space rat brain atlas that are grouped in these abbreviations is given in Supplemental Data 1.

**Supplemental Figure 3. Reliability of segmentations across researchers. Related to Transparent Methods, “Reliability of segmentations”.**

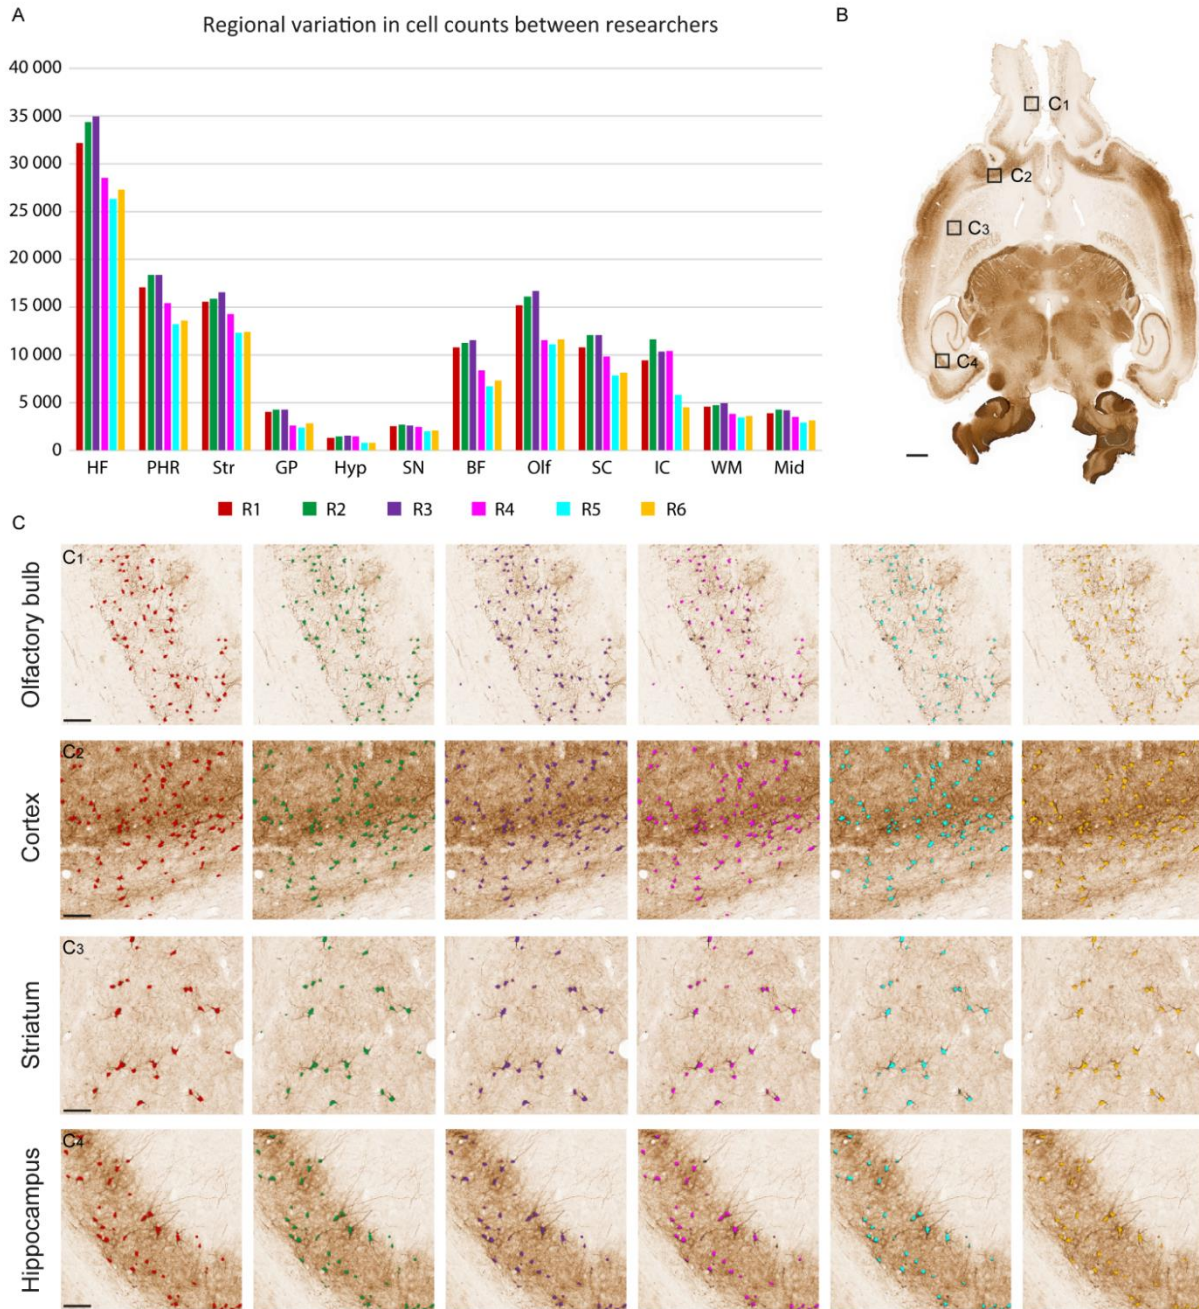

(A) Bar chart showing variations between different researchers segmentation results. One researcher (R1, red bars) performed a segmentation and provided documentation (see, Transparent methods) for replication of the analysis by researchers 2-5. Examples from the segmentations produced by each researcher are shown as overlays on the original images in the lower panel (C1-C4, colour coded in accordance with the bar graph). Scale bars are 1 mm in (B) and 100  $\mu$ m in C1-C4. Abbreviations: BF, basal forebrain; GP, globus pallidus; HF, hippocampal formation; Hyp, hypothalamus; IC, inferior colliculus; PHR, parahippocampal region; Mid, other midbrain regions Str, striatum; SN, substantia nigra; Olf, olfactory regions; SC, superior colliculus; WM, white matter. A list of which regions of the Waxholm Space rat brain atlas that are grouped in these abbreviations is given in Supplemental Data 1.

Supplemental Figure 4. Examples of images with atlas overlays and segmentation results. Related to Transparent Methods, “Image segmentation”.

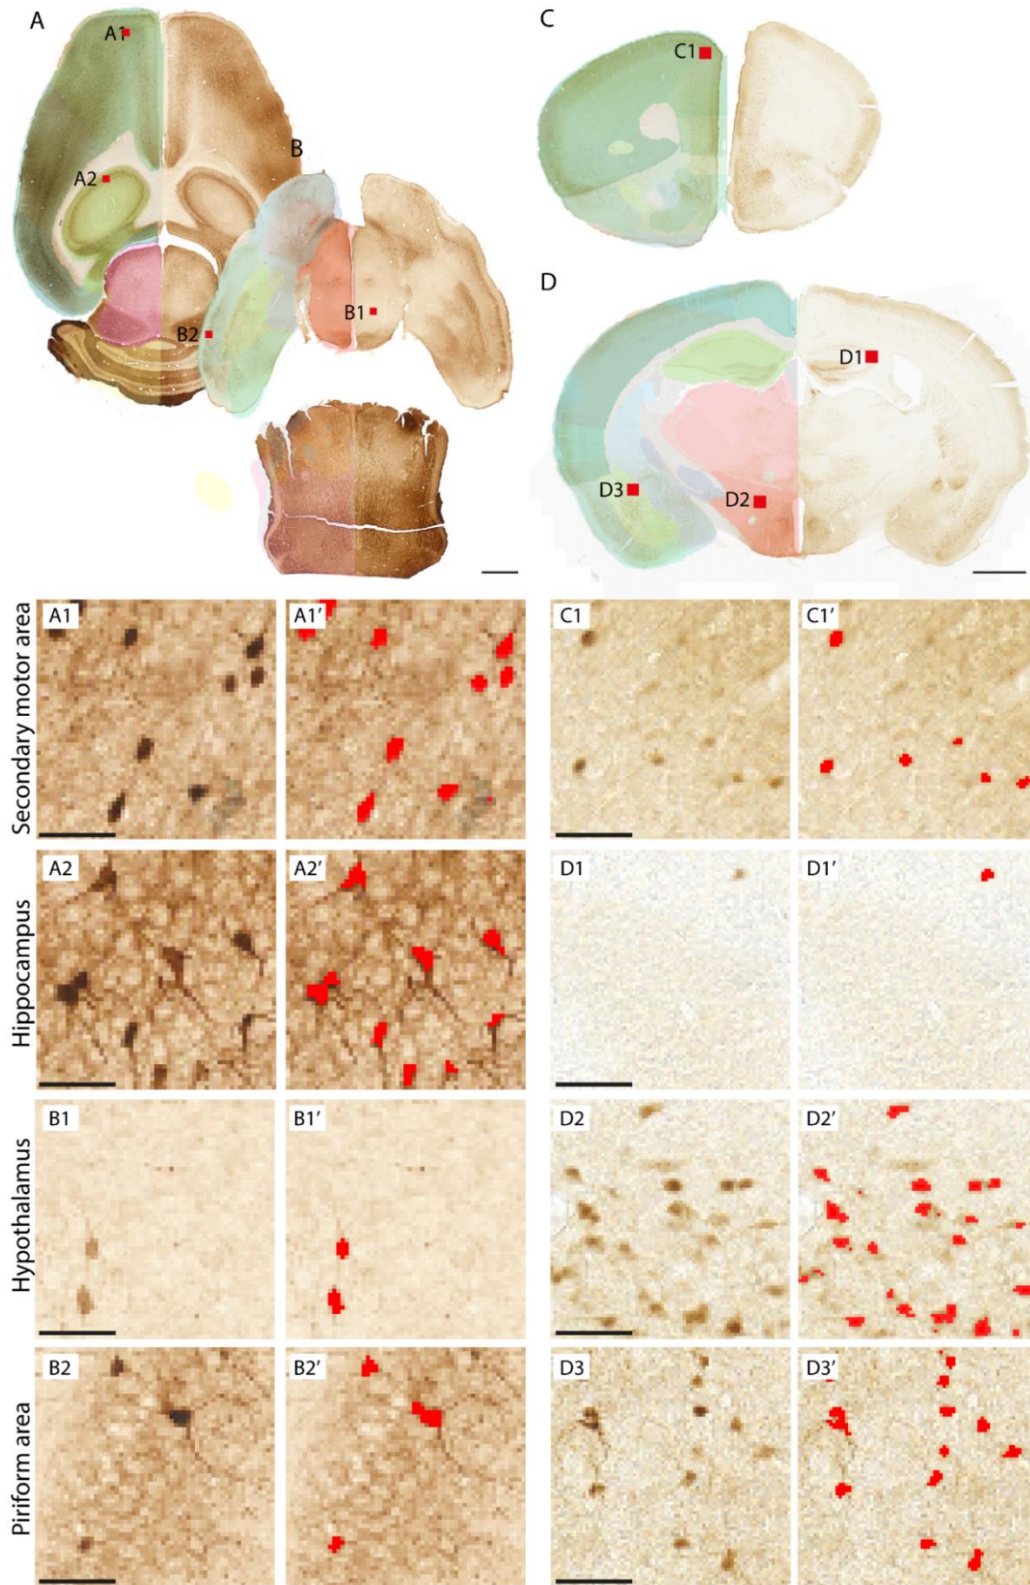

(A,B) show parvalbumin stained sections (from mouse 81265, sections 012 and 041, respectively), and (C,D) show calbindin stained sections (from mouse 6, sections 097 and 181, respectively). Atlas overlays are superimposed on one hemisphere. (A1-2, B1-2, C1, and D1-3) are enlarged images from selected regions as indicated in (A-D), showing regions secondary motor area (A1, C1), hippocampus (A2, D1), hypothalamus (A3, D2), and piriform area (A4, D3). Panels (A1'-2', B1'-2', C1' and D1'-3') show ilastik segmentations used for QUINT counts of labelled cells. Some lightly stained calbindin neurons (e.g. in hypothalamus) were not extracted by our classifier. Images are shown at the reduced resolution used for this analysis, high-resolution images are available from the shared datasets. Scale bars: upper panels, 1 mm; lower panels, 50  $\mu$ m.

Supplemental table 1: List of calbindin and parvalbumin numbers and densities in the mouse brain (related to Figure 2)

|                                                      |                                            | Volume | Parvalbumin    |             | Calbindin      |             |
|------------------------------------------------------|--------------------------------------------|--------|----------------|-------------|----------------|-------------|
|                                                      |                                            |        | Number         | Density     | Number         | Density     |
| <b>Volume:</b> region volume in mm <sup>3</sup>      |                                            |        |                |             |                |             |
| <b>Number:</b> bilateral total number estimate       |                                            |        |                |             |                |             |
| <b>Density:</b> estimated number per mm <sup>3</sup> |                                            |        |                |             |                |             |
| <b>Isocortex (ISO)</b>                               |                                            |        |                |             |                |             |
| ■ FRP                                                | Frontal pole, cerebral cortex              | 0.97   | 1 053 ± 148    | 1 081 ± 152 | 518 ± 214      | 532 ± 219   |
| ■ MOp                                                | Primary motor area                         | 12.19  | 15 446 ± 2 596 | 1 267 ± 213 | 10 727 ± 2 049 | 880 ± 168   |
| ■ MOs                                                | Secondary motor area                       | 13.10  | 16 519 ± 3 579 | 1 261 ± 273 | 10 254 ± 1 558 | 783 ± 119   |
| <i>Somatosensory areas (SS)</i>                      |                                            |        |                |             |                |             |
| ■ SSp-n                                              | Primary somatosensory area, nose           | 3.02   | 4 702 ± 204    | 1 557 ± 68  | 2 795 ± 513    | 926 ± 170   |
| ■ SSp-bfd                                            | Primary somatosensory area, barrel field   | 6.29   | 10 518 ± 1 048 | 1 673 ± 167 | 6 164 ± 10 05  | 980 ± 160   |
| ■ SSp-lI                                             | Primary somatosensory area, lower limb     | 2.35   | 4 272 ± 383    | 1 816 ± 163 | 3 711 ± 609    | 1 578 ± 259 |
| ■ SSp-m                                              | Primary somatosensory area, mouth          | 6.21   | 7 289 ± 685    | 1 174 ± 110 | 4 854 ± 748    | 782 ± 120   |
| ■ SSp-ul                                             | Primary somatosensory area, upper limb     | 3.77   | 6 659 ± 1 207  | 1 766 ± 320 | 4 566 ± 819    | 1 211 ± 217 |
| ■ SSp-tr                                             | Primary somatosensory area, trunk          | 1.40   | 2 778 ± 425    | 1 982 ± 303 | 2 218 ± 253    | 1 582 ± 181 |
| ■ SSp-un                                             | Primary somatosensory area, unassigned     | 1.26   | 2 478 ± 274    | 1 963 ± 217 | 1 537 ± 277    | 1 218 ± 220 |
| ■ SSs                                                | Supplemental somatosensory area            | 9.01   | 13 299 ± 670   | 1 475 ± 74  | 10 155 ± 1 908 | 1 126 ± 212 |
| <i>Gustatory and visceral areas</i>                  |                                            |        |                |             |                |             |
| ■ GU                                                 | Gustatory areas                            | 1.77   | 2 116 ± 392    | 1 197 ± 222 | 3 343 ± 423    | 1 890 ± 239 |
| ■ VISC                                               | Visceral areas                             | 2.35   | 2 789 ± 287    | 1 187 ± 122 | 3 874 ± 521    | 1 649 ± 222 |
| <i>Auditory areas (AUD)</i>                          |                                            |        |                |             |                |             |
| ■ AUDd                                               | Dorsal auditory area                       | 1.21   | 2 217 ± 302    | 1 825 ± 249 | 987 ± 133      | 813 ± 109   |
| ■ AUDp                                               | Primary auditory area                      | 2.15   | 4 173 ± 744    | 1 942 ± 346 | 1 920 ± 287    | 893 ± 133   |
| ■ AUDpo                                              | Posterior auditory area                    | 0.61   | 855 ± 163      | 1 397 ± 267 | 934 ± 136      | 1 526 ± 222 |
| ■ AUDv                                               | Ventral auditory area                      | 1.82   | 3 311 ± 607    | 1 821 ± 334 | 2 087 ± 271    | 1 148 ± 149 |
| <i>Visual areas (VIS)</i>                            |                                            |        |                |             |                |             |
| ■ VISal                                              | Anterolateral visual area                  | 0.76   | 1 291 ± 183    | 1 703 ± 241 | 990 ± 104      | 1 306 ± 137 |
| ■ VISam                                              | Anteromedial visual area                   | 0.79   | 1 883 ± 393    | 2 376 ± 496 | 933 ± 104      | 1 178 ± 204 |
| ■ VISl                                               | Lateral visual area                        | 1.23   | 1 978 ± 413    | 1 614 ± 337 | 1 772 ± 308    | 1 446 ± 251 |
| ■ VISp                                               | Primary visual area                        | 7.07   | 13 120 ± 2 514 | 1 855 ± 355 | 10 063 ± 1 333 | 1 423 ± 288 |
| ■ VISpl                                              | Posterolateral visual area                 | 0.79   | 1 190 ± 300    | 1 498 ± 378 | 1 150 ± 292    | 1 447 ± 367 |
| ■ VISpm                                              | Posteromedial visual area                  | 1.04   | 2 350 ± 381    | 2 241 ± 364 | 1 764 ± 285    | 1 682 ± 272 |
| ■ VISli                                              | Laterointermediate area                    | 0.49   | 688 ± 84       | 1 398 ± 170 | 791 ± 121      | 1 608 ± 246 |
| ■ VISpor                                             | Postrhinal area                            | 1.29   | 1 976 ± 458    | 1 541 ± 357 | 2 131 ± 165    | 1 662 ± 129 |
| <i>Anterior cingulate areas (ACA)</i>                |                                            |        |                |             |                |             |
| ■ ACAd                                               | Anterior cingulate area, dorsal part       | 3.13   | 5 890 ± 1 570  | 1 881 ± 501 | 3 702 ± 570    | 1 182 ± 182 |
| ■ ACAv                                               | Anterior cingulate area, ventral part      | 2.41   | 4 558 ± 706    | 1 893 ± 293 | 4 428 ± 505    | 1 838 ± 210 |
| <i>Prefrontal areas (PFA)</i>                        |                                            |        |                |             |                |             |
| ■ PL                                                 | Prelimbic area                             | 2.41   | 3 116 ± 551    | 1 293 ± 229 | 3 713 ± 322    | 1 541 ± 133 |
| ■ ILA                                                | Infralimbic area                           | 0.84   | 925 ± 190      | 1 095 ± 224 | 2 960 ± 211    | 3 506 ± 249 |
| ■ ORB                                                | Orbital area                               | 5.90   | 9 678 ± 1 632  | 1 640 ± 277 | 8 547 ± 1 376  | 1 448 ± 233 |
| ■ AGA                                                | Agranular insular area                     | 7.89   | 8 052 ± 1 290  | 1 020 ± 163 | 15 332 ± 1 448 | 1 942 ± 183 |
| <i>Retrosplenial areas (RSP)</i>                     |                                            |        |                |             |                |             |
| ■ RSPagl                                             | Retrosplenial area, lateral agranular part | 2.35   | 3 822 ± 723    | 1 621 ± 307 | 3 563 ± 515    | 1 512 ± 218 |
| ■ RSPd                                               | Retrosplenial area, dorsal part            | 3.80   | 5 142 ± 800    | 1 353 ± 211 | 3 052 ± 494    | 803 ± 130   |
| ■ RSPv                                               | Retrosplenial area, ventral part           | 4.35   | 7 727 ± 398    | 1 777 ± 92  | 1 331 ± 239    | 306 ± 55    |

### Other isocortical areas (ISOo)

|        |                                      |      |             |             |             |             |
|--------|--------------------------------------|------|-------------|-------------|-------------|-------------|
| ■ PTLp | Posterior parietal association areas | 2.46 | 4 121 ± 704 | 1 677 ± 287 | 2 439 ± 94  | 993 ± 38    |
| ■ TEa  | Temporal association areas           | 3.10 | 4 494 ± 957 | 1 449 ± 309 | 4 645 ± 425 | 1 497 ± 137 |
| ■ PERI | Perirhinal area                      | 0.79 | 526 ± 130   | 666 ± 165   | 1 169 ± 169 | 1 481 ± 214 |
| ■ ECT  | Ectorhinal area                      | 1.71 | 1 823 ± 298 | 1 065 ± 174 | 2 795 ± 277 | 1 632 ± 162 |

### Olfactory areas (OLF)

|        |                                        |       |                |             |                |             |
|--------|----------------------------------------|-------|----------------|-------------|----------------|-------------|
| ■ MOB  | Main olfactory bulb                    | 21.49 | 10 714 ± 4 632 | 499 ± 216   | 18 784 ± 1 355 | 874 ± 63    |
| ■ AOB  | Accessory olfactory bulb               | 0.65  | 65 ± 31        | 100 ± 48    | 107 ± 31       | 164 ± 48    |
| ■ AON  | Accessory olfactory nucleus            | 4.87  | 2 093 ± 704    | 430 ± 145   | 9 332 ± 987    | 1 916 ± 203 |
| ■ TT   | Taenia tecta                           | 1.44  | 672 ± 235      | 466 ± 163   | 1 574 ± 144    | 1 092 ± 100 |
| ■ DP   | Dorsal peduncular nucleus              | 0.50  | 754 ± 199      | 1 493 ± 394 | 1 677 ± 79     | 3 324 ± 156 |
| ■ PIR  | Piriform area                          | 11.57 | 6 108 ± 899    | 528 ± 78    | 17 379 ± 865   | 1 502 ± 75  |
| ■ NLOT | Nucleus of the lateral olfactory tract | 0.32  | 113 ± 39       | 353 ± 122   | 563 ± 132      | 1 763 ± 414 |
| ■ COA  | Cortical amygdalar area                | 3.27  | 1 392 ± 281    | 426 ± 86    | 7 589 ± 843    | 2 324 ± 258 |
| ■ PAA  | Piriform-amygdalar area                | 1.19  | 237 ± 138      | 199 ± 116   | 1 660 ± 199    | 1 393 ± 167 |
| ■ TR   | Postpiriform transition area           | 1.40  | 795 ± 178      | 566 ± 127   | 3 559 ± 417    | 2 534 ± 297 |

### Hippocampal formation (HPF)

#### Hippocampal region (HR)

|       |                  |       |               |           |               |           |
|-------|------------------|-------|---------------|-----------|---------------|-----------|
| ■ CA1 | Field CA1        | 10.19 | 6 631 ± 1 221 | 651 ± 120 | 5 893 ± 1 257 | 578 ± 123 |
| ■ CA2 | Field CA2        | 0.48  | 391 ± 61      | 823 ± 127 | 84 ± 19       | 177 ± 40  |
| ■ CA3 | Field CA3        | 6.26  | 3 835 ± 950   | 612 ± 152 | 1 638 ± 110   | 262 ± 17  |
| ■ DG  | Dentate gyrus    | 6.60  | 1 173 ± 372   | 178 ± 56  | 5 778 ± 896   | 876 ± 136 |
| ■ FC  | Fasciola cinerea | 0.06  | 61 ± 19       | 996 ± 304 | 1 ± 1         | 16 ± 16   |
| ■ IG  | Induseum griseum | 0.12  | 45 ± 15       | 355 ± 115 | 23 ± 7        | 183 ± 54  |

#### Retrohippocampal region (RHP)

|        |                                      |      |             |             |                |             |
|--------|--------------------------------------|------|-------------|-------------|----------------|-------------|
| ■ ENTI | Entorhinal area, lateral part        | 6.38 | 3 869 ± 478 | 607 ± 75    | 10 580 ± 1 257 | 1 659 ± 197 |
| ■ ENTm | Entorhinal area, medial part         | 5.02 | 8 384 ± 940 | 1 671 ± 187 | 4 962 ± 586    | 989 ± 117   |
| ■ PAR  | Parasubiculum                        | 0.93 | 2 439 ± 251 | 2 614 ± 269 | 658 ± 83       | 706 ± 89    |
| ■ POST | Postsubiculum                        | 1.08 | 2 264 ± 397 | 2 088 ± 366 | 528 ± 112      | 487 ± 104   |
| ■ PRE  | Presubiculum                         | 0.92 | 2 314 ± 366 | 2 525 ± 400 | 479 ± 134      | 523 ± 146   |
| ■ SUB  | Subiculum                            | 2.10 | 4 347 ± 355 | 2 072 ± 169 | 909 ± 221      | 433 ± 106   |
| ■ ProS | Prosubiculum                         | 1.33 | 1 550 ± 205 | 1 167 ± 155 | 924 ± 141      | 696 ± 106   |
| ■ HATA | Hippocampo-amygdalar transition area | 0.42 | 441 ± 125   | 1 047 ± 296 | 1 061 ± 128    | 2 519 ± 303 |
| ■ APr  | Area prostriata                      | 0.32 | 432 ± 30    | 1 324 ± 91  | 279 ± 64       | 853 ± 263   |

### Cortical subplate (CTXsp)

|       |                               |      |             |             |             |             |
|-------|-------------------------------|------|-------------|-------------|-------------|-------------|
| ■ CLA | Claustrium                    | 0.55 | 397 ± 45    | 721 ± 82    | 859 ± 64    | 1 559 ± 116 |
| ■ EP  | Endopiriform nucleus          | 2.79 | 1 330 ± 230 | 476 ± 82    | 6 186 ± 477 | 2 215 ± 171 |
| ■ LA  | Lateral amygdalar nucleus     | 0.84 | 351 ± 65    | 418 ± 77    | 829 ± 130   | 986 ± 154   |
| ■ BLA | Basolateral amygdalar nucleus | 1.90 | 1 151 ± 308 | 606 ± 162   | 4 486 ± 631 | 2 361 ± 332 |
| ■ BMA | Basomedial amygdalar nucleus  | 1.49 | 841 ± 245   | 567 ± 165   | 4 109 ± 681 | 2 766 ± 458 |
| ■ PA  | Posterior amygdalar nucleus   | 0.97 | 1 304 ± 482 | 1 349 ± 499 | 5 554 ± 569 | 5 745 ± 589 |

### Cerebral nuclei (CNU)

#### Striatum (STR)

|        |                                |       |              |          |                |             |
|--------|--------------------------------|-------|--------------|----------|----------------|-------------|
| ■ CP   | Caudoputamen                   | 26.01 | 15 015 ± 519 | 577 ± 20 | 48 064 ± 7 665 | 1 847 ± 295 |
| ■ STRv | Striatum ventral region        | 4.83  | 1 578 ± 206  | 327 ± 43 | 10 027 ± 1 326 | 2 076 ± 275 |
| ■ OT   | Olfactory tubercle             | 3.82  | 1 327 ± 283  | 347 ± 74 | 1 597 ± 182    | 418 ± 48    |
| ■ LSX  | Lateral septal complex         | 3.56  | 444 ± 119    | 125 ± 33 | 11 005 ± 982   | 3 088 ± 276 |
| ■ sAMY | Striatum-like amygdalar nuclei | 4.05  | 871 ± 200    | 215 ± 49 | 10 291 ± 1 188 | 2 540 ± 293 |

#### Pallidum (PAL)

|        |                                    |      |             |           |               |             |
|--------|------------------------------------|------|-------------|-----------|---------------|-------------|
| ■ GPe  | Globus pallidus, external segment  | 1.56 | 337 ± 220   | 216 ± 140 | 350 ± 38      | 223 ± 24    |
| ■ GPi  | Globus pallidus, internal segment  | 0.42 | 108 ± 49    | 254 ± 115 | 24 ± 7        | 57 ± 16     |
| ■ PALv | Pallidum, ventral region           | 3.39 | 1 496 ± 298 | 441 ± 88  | 3 196 ± 462   | 942 ± 136   |
| ■ PALm | Pallidum, medial region            | 1.51 | 1 060 ± 359 | 701 ± 238 | 3 766 ± 712   | 2 492 ± 471 |
| ■ BST  | Bed nuclei of the stria terminalis | 1.34 | 216 ± 58    | 161 ± 43  | 5 832 ± 1 067 | 4 349 ± 796 |

### Thalamus (TH)

|        |                                      |      |             |          |               |               |
|--------|--------------------------------------|------|-------------|----------|---------------|---------------|
| ■ VENT | Ventral group of the dorsal thalamus | 4.86 | 1 267 ± 315 | 261 ± 65 | 5 078 ± 1 282 | 1 045 ± 264   |
| ■ SPF  | Subparafascicular nucleus            | 0.20 | 7 ± 3       | 32 ± 15  | 507 ± 97      | 2 474 ± 474   |
| ■ SPA  | Subparafascicular area               | 0.13 | 4 ± 2       | 28 ± 14  | 658 ± 202     | 4 964 ± 1 526 |
| ■ PP   | Peripeduncular area                  | 0.06 | 6 ± 4       | 96 ± 68  | 389 ± 91      | 6 359 ± 1 482 |



|                                                   |        |                                                           |       |                |             |               |             |
|---------------------------------------------------|--------|-----------------------------------------------------------|-------|----------------|-------------|---------------|-------------|
| ■                                                 | GENd   | Geniculate group, dorsal thalamus                         | 1.42  | 58 ± 26        | 41 ± 18     | 893 ± 241     | 628 ± 170   |
| ■                                                 | LAT    | Lateral group of the dorsal thalamus                      | 3.08  | 323 ± 98       | 105 ± 32    | 3 540 ± 860   | 1 151 ± 279 |
| ■                                                 | ATN    | Anterior group of the dorsal thalamus                     | 2.16  | 304 ± 70       | 141 ± 33    | 1 084 ± 314   | 502 ± 146   |
| ■                                                 | MED    | Medial group of the dorsal thalamus                       | 2.08  | 247 ± 33       | 123 ± 16    | 5 844 ± 1 328 | 2 897 ± 658 |
| ■                                                 | MTN    | Midline group of the dorsal thalamus                      | 1.19  | 121 ± 44       | 102 ± 37    | 5 438 ± 976   | 4 585 ± 823 |
| ■                                                 | ILM    | Intralaminar nuclei of the dorsal thalamus                | 1.60  | 78 ± 29        | 49 ± 18     | 3 880 ± 932   | 2 424 ± 582 |
| ■                                                 | RT     | Reticular nucleus of the thalamus                         | -     | -              | -           | 416 ± 70      | 287 ± 48    |
| ■                                                 | GENv   | Geniculate group, ventral thalamus                        | 0.52  | 282 ± 118      | 539 ± 225   | 405 ± 71      | 773 ± 136   |
| ■                                                 | EPI    | Epithalamus                                               | 0.66  | 124 ± 58       | 186 ± 87    | 1 920 ± 285   | 2 888 ± 429 |
| <b>Hypothalamus (HY)</b>                          |        |                                                           |       |                |             |               |             |
| ■                                                 | PVZ    | Periventricular zone                                      | 0.78  | 62 ± 28        | 79 ± 36     | 2 046 ± 240   | 2 614 ± 307 |
| ■                                                 | PVR    | Periventricular region                                    | 2.04  | 580 ± 126      | 283 ± 61    | 5 859 ± 815   | 2 864 ± 398 |
| ■                                                 | AHN    | Anterior hypothalamic nucleus                             | 0.71  | 274 ± 103      | 385 ± 145   | 3 881 ± 592   | 5 462 ± 833 |
| ■                                                 | MBO    | Mammillary body                                           | 1.02  | 902 ± 175      | 888 ± 172   | 3 779 ± 578   | 3 720 ± 569 |
| ■                                                 | MPN    | Medial preoptic nucleus                                   | 0.41  | 47 ± 16        | 115 ± 40    | 3 253 ± 396   | 8 003 ± 975 |
| ■                                                 | PM     | Premammillary nuclei                                      | 0.33  | 113 ± 37       | 344 ± 113   | 721 ± 234     | 2 202 ± 716 |
| ■                                                 | PVH    | Paraventricular hypothalamic nucleus, descending division | 0.13  | 13 ± 8         | 101 ± 64    | 542 ± 29      | 4 150 ± 219 |
| ■                                                 | VMH    | Ventromedial hypothalamic nucleus                         | 0.55  | 85 ± 19        | 154 ± 35    | 3 460 ± 404   | 6 298 ± 736 |
| ■                                                 | PH     | Posterior hypothalamic nucleus                            | 0.71  | 65 ± 18        | 92 ± 26     | 893 ± 255     | 1 263 ± 360 |
| ■                                                 | LZ     | Hypothalamic lateral zone                                 | 5.69  | 2 017 ± 620    | 355 ± 109   | 8 049 ± 1 250 | 1 416 ± 220 |
| ■                                                 | ME     | Median eminence                                           | 0.09  | 0 ± 0          | 0 ± 0       | 6 ± 5         | 74 ± 60     |
| <b>Midbrain (MB)</b>                              |        |                                                           |       |                |             |               |             |
| <i>Midbrain, sensory related (MBsen)</i>          |        |                                                           |       |                |             |               |             |
| ■                                                 | SCs    | Superior colliculus, sensory related                      | 2.16  | 3 813 ± 554    | 1 768 ± 257 | 7 213 ± 928   | 3 345 ± 430 |
| ■                                                 | IC     | Inferior colliculus                                       | 4.44  | 6 011 ± 1 424  | 1 352 ± 320 | 450 ± 65      | 101 ± 15    |
| ■                                                 | NB     | Nucleus of the brachium of the inferior colliculus        | 0.09  | 67 ± 19        | 766 ± 214   | 32 ± 11       | 359 ± 129   |
| ■                                                 | SAG    | Nucleus sagulum                                           | 0.10  | 66 ± 38        | 671 ± 391   | 15 ± 4        | 148 ± 43    |
| ■                                                 | PBG    | Parabigeminal nucleus                                     | 0.04  | 26 ± 11        | 572 ± 254   | 3 ± 2         | 45 ± 45     |
| ■                                                 | MEV    | Midbrain trigeminal nucleus                               | 0.01  | 2 ± 1          | 231 ± 148   | 15 ± 3        | 1 585 ± 289 |
| ■                                                 | SCO    | Subcommissural organ                                      | 0.01  | 8 ± 5          | 556 ± 313   | 3 ± 2         | 208 ± 138   |
| ■                                                 | SN     | Substantia nigra                                          | 1.74  | 342 ± 138      | 196 ± 79    | 132 ± 39      | 76 ± 23     |
| <i>Midbrain, motor related (MBmot)</i>            |        |                                                           |       |                |             |               |             |
| ■                                                 | VTA    | Ventral tegmental area                                    | 0.43  | 146 ± 60       | 341 ± 140   | 1 860 ± 392   | 4 339 ± 914 |
| ■                                                 | PN     | Paranigral nucleus                                        | 0.02  | 2 ± 1          | 101 ± 64    | 64 ± 13       | 2 951 ± 620 |
| ■                                                 | MRN    | Midbrain reticular nucleus                                | 5.28  | 2 449 ± 733    | 464 ± 139   | 901 ± 241     | 171 ± 46    |
| ■                                                 | SCm    | Superior colliculus, motor related                        | 5.65  | 3 981 ± 1 345  | 704 ± 238   | 2 716 ± 836   | 480 ± 148   |
| ■                                                 | PAG    | Periaqueductal grey                                       | 4.69  | 833 ± 352      | 178 ± 75    | 5 962 ± 1 231 | 1 270 ± 262 |
| ■                                                 | PRT    | Pretecal region                                           | 2.08  | 1 380 ± 434    | 663 ± 209   | 578 ± 119     | 278 ± 57    |
| ■                                                 | MBm-o  | Midbrain, motor related, other                            | 1.60  | 822 ± 152      | 517 ± 96    | 296 ± 55      | 186 ± 35    |
| <i>Midbrain, behavioral state related (MBsta)</i> |        |                                                           |       |                |             |               |             |
| ■                                                 | PPN    | Pedunculopontine nucleus                                  | 0.89  | 332 ± 98       | 372 ± 110   | 461 ± 133     | 516 ± 149   |
| ■                                                 | RAmb   | Midbrain raphe nuclei                                     | 0.73  | 345 ± 127      | 471 ± 173   | 1 373 ± 272   | 1 872 ± 371 |
| <b>Pons (PE)</b>                                  |        |                                                           |       |                |             |               |             |
| ■                                                 | P-sen  | Pons, sensory related                                     | 3.85  | 5 099 ± 483    | 1 324 ± 126 | 3 128 ± 691   | 812 ± 179   |
| ■                                                 | P-mot  | Pons, motor related                                       | 8.16  | 2 478 ± 1 092  | 304 ± 30    | 985 ± 156     | 121 ± 19    |
| ■                                                 | P-sat  | Pons, behavioral state related                            | 1.10  | 1 015 ± 285    | 923 ± 259   | 871 ± 248     | 792 ± 226   |
| <b>Medulla (MY)</b>                               |        |                                                           |       |                |             |               |             |
| ■                                                 | MY-ua  | Medulla, unassigned                                       | 5.32  | 2 545 ± 483    | 478 ± 91    | 1 032 ± 409   | 194 ± 77    |
| ■                                                 | MY-sen | Medulla, sensory related                                  | 7.83  | 13 232 ± 1 092 | 1 690 ± 140 | 4 821 ± 2 155 | 616 ± 275   |
| ■                                                 | MY-mot | Medulla, motor related                                    | 19.75 | 11 369 ± 1 141 | 576 ± 58    | 3 493 ± 1 090 | 177 ± 55    |
| ■                                                 | MY-sat | Medulla, behavioral state related                         | 0.22  | 55 ± 14        | 245 ± 63    | 30 ± 10       | 134 ± 46    |

**Supplemental Table 2: List of mouse parvalbumin literature sources (related to Figure 5)**

| Mouse parvalbumin neuron densities |                          |                   |                                        |              |                 |                   |                            |                                  |
|------------------------------------|--------------------------|-------------------|----------------------------------------|--------------|-----------------|-------------------|----------------------------|----------------------------------|
| Source                             | PMID                     | Strain            | Brain region                           | # of animals | Counting method | Section thickness | Density (mm <sup>3</sup> ) | Antibody                         |
| Grünewald et al., 2017             | <a href="#">29135436</a> | 129/Sv            | Amygdala (whole region)                | 14           | Direct count    | 30                | 2 649                      | RRID: AB_2631173                 |
| Fasulo et al., 2017                | <a href="#">28232789</a> | Other             | Basolateral amygdala                   | 4            | Stereology      | 40                | 1 400                      | No info                          |
| Jinno and Kosaka, 2006             | <a href="#">16930755</a> | C57BL/6J          | CA1                                    | 4            | Stereology      | 50                | 1 405                      | Kägi et al. (1987)               |
| Neddens and Buonanno, 2009         | <a href="#">19655320</a> | C57BL/6           | CA1                                    | 4            | Direct count    | 50                | 1 158                      | rabbit polyclonal anti pv, Swant |
| Pitts et al., 2013                 | <a href="#">23880772</a> | C57BL/6J          | CA1 of dorsal hippocampus              | 6            | Stereology      | 40                | 1 480                      | RRID:AB_10000344                 |
| Pitts et al., 2013                 | <a href="#">23880772</a> | C57BL/6J          | CA2/3 of dorsal hippocampus            | 6            | Stereology      | 40                | 2 171                      | RRID:AB_10000344                 |
| Jinno and Kosaka, 2006             | <a href="#">16930755</a> | C57BL/6J          | CA3                                    | 4            | Stereology      | 50                | 1 535                      | Kägi et al. (1987)               |
| Neddens and Buonanno, 2009         | <a href="#">19655320</a> | C57BL/6           | CA3                                    | 4            | Direct count    | 50                | 1 127                      | rabbit polyclonal anti pv, Swant |
| Grünewald et al., 2017             | <a href="#">29135436</a> | 129/Sv            | CA3                                    | 14           | Stereology      | 30                | 5 796                      | RRID: AB_2631173                 |
| Filice et al., 2016*               | <a href="#">26819149</a> | C57BL/6J          | Caudoputamen                           | 5            | Stereology      |                   | 897                        | RRID:AB_10000344                 |
| Lauber et al., 2018*               | <a href="#">30116174</a> | C57BL/6J          | Caudoputamen                           | 6            | Stereology      |                   | 819                        | RRID:AB_10000344                 |
| Lauber et al., 2016*               | <a href="#">28066177</a> | C57BL/6J          | Caudoputamen                           | 5            | Stereology      |                   | 817                        | RRID:AB_10000344                 |
| Andsberg et al., 2001*             | <a href="#">11358448</a> | C57BL/6J          | Caudoputamen                           | 7            | Stereology      | 40                | 864                        | polyclonal rabbit anti pv        |
| Smith et al., 2008                 | <a href="#">17988653</a> | Other             | Caudoputamen                           | 3            | Stereology      | 50                | 3 522                      | No info                          |
| Yalcin-Cakmakli et al., 2018*      | <a href="#">29997483</a> | C57BL/6J x DBA/2J | Caudoputamen                           | 3            | Stereology      | 30                | 953                        | RRID:AB_2631173                  |
| Song et al., 2013*                 | <a href="#">23336980</a> | C57BL/6J          | Caudoputamen                           | 12           | Stereology      | 40                | 612                        | No info                          |
| Filice et al., 2016*               | <a href="#">26819149</a> | C57BL/6J          | Caudoputamen                           | 5            | Stereology      |                   | 714                        | RRID:AB_10000344                 |
| Ransome and Turnley, 2005          | <a href="#">15837129</a> | C57BL/6           | Caudoputamen                           | 3            | Stereology      | 30                | 1 060                      | mouse anti-parvalbumin, Chemicon |
| Förster, 2008                      | **                       | C57BL/6J          | Caudoputamen                           | 6            | Stereology      | 25                | 1 430                      | PARV-19, Sigma                   |
| Fasulo et al., 2017                | <a href="#">28232789</a> | Other             | Dentate gyrus                          | 4            | Stereology      | 40                | 400                        | No info                          |
| Fasulo et al., 2017                | <a href="#">28232789</a> | Other             | Dentate gyrus                          | 4            | Stereology      | 40                | 1 200                      | No info                          |
| Fasulo et al., 2017                | <a href="#">28232789</a> | Other             | Dentate gyrus                          | 4            | Stereology      | 40                | 1 100                      | No info                          |
| Jinno and Kosaka, 2006             | <a href="#">16930755</a> | C57BL/6J          | Dentate gyrus                          | 4            | Stereology      | 50                | 650                        | Kägi et al. (1987)               |
| Neddens and Buonanno, 2009         | <a href="#">19655320</a> | C57BL/6           | Dentate gyrus                          | 4            | Direct count    | 50                | 745                        | rabbit polyclonal anti pv, Swant |
| Pitts et al., 2013                 | <a href="#">23880772</a> | C57BL/6J          | Dentate gyrus of dorsal hippocampus    | 6            | Stereology      | 40                | 493                        | RRID:AB_10000344                 |
| Smith et al., 2008*                | <a href="#">17988653</a> | Other             | Globus pallidus                        | 3            | Stereology      | 50                | 40 194                     | No info                          |
| Pitts et al., 2013                 | <a href="#">23880772</a> | C57BL/6J          | Inferior colliculus                    | 6            | Stereology      | 40                | 4 836                      | RRID:AB_10000344                 |
| Moreno-Gonzalez et al., 2009       | <a href="#">19661615</a> | C57BL/6           | Lateral entorhinal area                | 5            | Stereology      | 40                | 4 300                      | rabbit polyclonal anti pv, Swant |
| Parrish-Aungst et al., 2007        | <a href="#">17311323</a> | C57BL/6J          | Main olfactory bulb                    | 4            | Stereology      | 25                | 2 324                      | RRID:AB_10000343                 |
| Pirone et al., 2018                | <a href="#">30369876</a> | Other             | Medial prefrontal cortex (infralimbic) | 3            | Direct count    | 20                | 2 052                      | RRID: AB_2631173                 |
| Pirone et al., 2018                | <a href="#">30369876</a> | Other             | Medial prefrontal cortex (prelimbic)   | 3            | Direct count    | 20                | 3 167                      | RRID: AB_2631173                 |
| Pitts et al., 2013                 | <a href="#">23880772</a> | C57BL/6J          | Medial septum                          | 6            | Stereology      | 40                | 1 678                      | RRID:AB_10000344                 |
| Smith et al., 2008*                | <a href="#">17988653</a> | Other             | Nucleus accumbens                      | 3            | Stereology      | 50                | 2 557                      | No info                          |

| Source                        | PMID                     | Strain   | Brain region         | # of animals | Counting method | Section thickness | Density (mm <sup>3</sup> ) | Antibody                         |
|-------------------------------|--------------------------|----------|----------------------|--------------|-----------------|-------------------|----------------------------|----------------------------------|
| Sanchez-Mejias et al., 2020   | <a href="#">31491047</a> | C57BL/6J | Perirhinal area 35   | 3            | Stereology      | 40                | 10 765                     | No info                          |
| Sanchez-Mejias et al., 2020   | <a href="#">31491047</a> | C57BL/6J | Perirhinal area 36   | 3            | Stereology      | 40                | 10 974                     | No info                          |
| Ransome and Turnley, 2005     | <a href="#">15837129</a> | C57BL/6  | Somatosensory cortex | 3            | Stereology      | 30                | 4 580                      | mouse anti-parvalbumin, Chemicon |
| Pitts et al., 2013            | <a href="#">23880772</a> | C57BL/6J | Somatosensory cortex | 6            | Stereology      | 40                | 5 329                      | RRID:AB_10000344                 |
| Neddens and Buonanno, 2009    | <a href="#">19655320</a> | C57BL/6  | Subiculum            | 4            | Direct count    | 50                | 2 048                      | rabbit polyclonal anti pv, Swant |
| Trujillo-Estrada et al., 2014 | <a href="#">24927710</a> | C57BL/6  | Subiculum            | 5            | Stereology      | 40                | 10 721                     | rabbit polyclonal anti pv, Swant |

\* These densities were obtained by dividing total number estimates reported in sources by the volume of the region (as defined by the Allen Mouse brain Common Coordinate Framework, version 3, 2017 edition; see main text for details).

\*\* Thesis, no PMID available. Available from:

<http://citeseerx.ist.psu.edu/viewdoc/download?doi=10.1.1.427.6474&rep=rep1&type=pdf>

**Supplemental Table 3: List of mouse calbindin literature sources (related to Figure 2)**

| Mouse calbindin neuron densities |                          |          |                         |              |                 |                   |                             |                     |
|----------------------------------|--------------------------|----------|-------------------------|--------------|-----------------|-------------------|-----------------------------|---------------------|
| Source                           | PMID                     | Strain   | Brain region            | # of animals | Counting method | Section thickness | Density per mm <sup>3</sup> | Antibody            |
| Grünwald et al., 2017            | <a href="#">29135436</a> | 129/Sv   | Amygdala (whole region) | 12           | Direct count    | 30                | 5 005                       | RRID: AB_10000340   |
| Grünwald et al., 2017            | <a href="#">29135436</a> | 129/Sv   | CA3                     | 14           | Stereology      | 30                | 945                         | RRID: AB_10000340   |
| Jinno and Kosaka, 2006           | <a href="#">16930755</a> | C57BL/6J | CA1                     | 4            | Stereology      | 50                | 1 555                       | Pinol et al. (1990) |
| Jinno and Kosaka, 2006           | <a href="#">16930755</a> | C57BL/6J | CA3                     | 4            | Stereology      | 50                | 1 590                       | Pinol et al. (1990) |
| Jinno and Kosaka, 2006           | <a href="#">16930755</a> | C57BL/6J | DG                      | 4            | Stereology      | 50                | 210                         | Pinol et al. (1990) |
| Parrish-Aungst et al., 2007      | <a href="#">17311323</a> | C57BL/6J | Main olfactory bulb     | 4            | Stereology      | 25                | 10 916                      | RRID:AB_2721225     |

**Supplemental Table 4: List of rat parvalbumin literature sources (related to Figure 2)**

| Rat parvalbumin neuron densities |                          |                |                     |              |                 |                   |                            |                                                      |
|----------------------------------|--------------------------|----------------|---------------------|--------------|-----------------|-------------------|----------------------------|------------------------------------------------------|
| Source                           |                          | Strain         | Brain region        | # of animals | Counting method | Section thickness | Density (mm <sup>3</sup> ) | Antibody                                             |
| Wang et al., 2008                | <a href="#">18059437</a> | Sprague-Dawley | CA1                 |              | Direct count    | 50                | 1 600                      | RRID:AB_477329                                       |
| Bezaire and Soltesz, 2013        | <a href="#">23674373</a> | -              | CA1                 | -            | See legend*     | -                 | -                          | -                                                    |
| Aika et al., 1994                | <a href="#">7925807</a>  | Wistar         | CA1, dorsal         | 5            | Stereology      | 0,5               | 1 100                      | Polyclonal rabbit anti PV antibody<br>RRID:AB_477329 |
| Wang et al., 2008                | <a href="#">18059437</a> | Sprague-Dawley | Caudoputamen        |              | Direct count    | 50                | 846                        | RRID:AB_477329                                       |
| Kaalund et al., 2013             | <a href="#">23083323</a> | Lister Hooded  | Dentate gyrus       |              | Stereology      | 60                | 2 128                      | No info                                              |
| Megahed et al., 2015             | <a href="#">25620912</a> | Sprague-Dawley | Dentate gyrus       | 6            | Stereology      | 30                | 2 125                      | No info                                              |
| Shiraki et al., 2016             | <a href="#">27553673</a> | Sprague-Dawley | Dentate gyrus hilus | 10           | Direct count    | 3                 | 1 461                      | PARV-19 Millipore                                    |
| Kaalund et al., 2013             | <a href="#">23083323</a> | Lister Hooded  | Hippocampus CA      |              | Stereology      | 60                | 2 994                      | No info                                              |
| Megahed et al., 2015             | <a href="#">25620912</a> | Sprague-Dawley | Hippocampus CA      | 6            | Stereology      | 30                | 3 064                      | No info                                              |
| Barinka et al., 2012             | <a href="#">22221733</a> | Wistar         | Perirhinal area 35  | 6            | Stereology      |                   | 3 805                      | Monoclonal mouse anti PV                             |
| Barinka et al., 2012             | <a href="#">22221733</a> | Wistar         | Perirhinal area 36  | 6            | Stereology      |                   | 4 336                      | Monoclonal mouse anti PV                             |

\* Bezaire & Soltesz (2013) used a combination of literature derived data and calculations to arrive at an estimate of parvalbumin neurons in the rat CA1 (10010 parvalbumin positive neurons unilaterally). Our estimate is 9 198 parvalbumin positive neurons unilaterally in rat CA1.

# Transparent methods

## EXPERIMENTAL MODEL AND SUBJECT DETAILS

Experimental procedures involving animals were approved by the Norwegian Food Safety Authority and carried out in accordance with the European Union and International legislation for the use of animal subjects. Four adult (6 months old) male PVCre X Rosa26eYFP mice (RRID:IMSR\_JAX:008069 and RRID:IMSR\_JAX:007903, respectively, crossed locally) and four adult female Sprague-Dawley rats (3 months old, Charles River, Sulzfeld/Kisslegg, Germany) housed at the Kavli Institute, Norwegian Institute of Science and Technology (NTNU), Norway were used for parvalbumin immunohistochemistry. Six adult C57Bl6/J mice (four females and two males, four months old, females from Janvier Labs and males from Taconic), housed at the Institute for Basic Medical Sciences, University of Oslo, Norway, were used for calbindin immunohistochemistry. Animals were housed according to the recommendations by FELASA under pathogen free conditions, with the exception of the presence of *Entamoeba muris* detected by PCR in fecal samples for the rats. Up to two rats and five mice of the same sex were group-housed in transparent, semi-enriched cages with 12:12 reversed day / night cycles and ad libitum access to food and water.

## DATA ACQUISITION

### *Immunohistochemistry*

For parvalbumin immunohistochemistry, animals were deeply anesthetised with sodium pentobarbital (50 mg/kg body weight) and transcardially perfused with Ringer solution containing 4 % paraformaldehyde (PFA). Brains were postfixed in PFA for approximately 24 hours and cryoprotected in a solution of 2 % DMSO and 20 % glycerol in phosphate buffer (PB). Horizontal sections were cut at 30  $\mu\text{m}$  (mouse brains) or 40  $\mu\text{m}$  (rat brains) on a freezing microtome. For calbindin immunohistochemistry, mice were anesthetized with isoflurane, given an overdose of Zoletil mixture, and transcardially perfused with NAPI followed by 4 % PFA. The brains were postfixed overnight in the same fixative, and transferred to 0.4 % PFA for storage. Prior to cutting, the brains were cryoprotected by immersion in 10, 20 and 30 % sucrose until they sank. The right hemisphere was marked by making shallow cut in the cortical surface. Brains were coronally divided at the level of the dorsal hippocampus before coronal sections of 40  $\mu\text{m}$  were cut using a freezing microtome. For all experiments, free-floating sections were used for immunohistochemistry according to the avidin-biotin peroxidase method, using 3,3'-diaminobenzidine (DAB) as the chromogen (every fourth for parvalbumin immunohistochemistry, and every sixth for calbindin). All subsequent steps were performed at room temperature, unless otherwise specified.

*Parvalbumin immunohistochemistry.* Sections were rinsed with PB before blocking endogenous peroxidase activity by incubation in a solution of 3 %  $\text{H}_2\text{O}_2$  and 10 % methanol in PB. Sections were rinsed again with PB, but subsequent washes were done using Tris buffered saline with 0.5% triton (TBS-TX). The sections were pre-incubated for 1 hour in 5 % normal goat serum in TBS-TX before overnight incubation at 4°C with the primary antibodies (diluted 1:4000 in TBS-TX). A monoclonal mouse anti-parvalbumin antibody (RRID:AB\_477329) was used for the rat brain sections, and a monoclonal rabbit anti parvalbumin (RRID:AB\_2631173) for the mouse brain sections. After rinsing, sections were incubated overnight at 4°C with polyclonal, biotinylated secondary antibodies: a goat anti mouse (RRID:AB\_258604) antibody for the rat brain sections and a goat anti rabbit (RRID:AB\_258649) antibody for the mouse brain sections. Sections were rinsed and then incubated for 1.5 hour with the VectaStain ABC HRP kit, according to manufacturer's instructions. After rinsing again with TBS-TX, the sections were rinsed twice with Tris-HCl before incubation with the DAB solution. The solution was made by adding a 10 mg DAB tablet to 20 mL Tris-HCl, and the tablet was dissolved by placing the solution on a heated stirrer for 2 hours. Afterwards,  $\text{H}_2\text{O}_2$  was added to the solution, which was then placed in the freezer for 20 minutes to slow down the reaction with the sections. The sections were incubated with the DAB solution for approximately 3 minutes and then rinsed with Tris-HCl. The sections were mounted on Superfrost microscope slides with Tris-HCl, and then dried and coverslipped using Entellan (Merck Millipore, Darmstadt, Germany).

*Calbindin immunohistochemistry.* Sections were rinsed with PBS three times. Endogeneous peroxidase activity was blocked by incubating sections with 3% H<sub>2</sub>O<sub>2</sub> for five minutes. After three brief rinses in PBS, sections were incubated in blocking solution (3% normal donkey serum, 1% BSA and 0.1% triton X in PBS) for 1 hour. Sections were incubated in the primary antibody (monoclonal mouse anti calbindin, Swant 300, RRID:AB\_10000347, lot no. 07F) overnight at 4°C. The antibody is specific to calbindin-D28k and does not bind to calretinin or other known calcium bindin proteins (manufacturer's description). Control sections processed without the primary antibody did not show specific labelling, and are shared together with the data sets. The next day, sections were washed in PBS before incubation with the secondary antibody (sheep anti mouse, GE Healthcare RPN1001V) for one hour. After rinsing, sections were incubated with ABC kit for 30 minutes, and rinsed again with PBS. Sections were then reacted with DAB and H<sub>2</sub>O<sub>2</sub> (kit from Abcam, used according to manufacturer's instructions) for five minutes. The reaction was stopped with distilled water. Sections were mounted from PBS onto gelatinized microscope slides, dehydrated through an ascending series of ethanol (70, 90 and 100 % for two minutes each) followed by two times two minutes in xylene, dried and coverslipped with Entellan.

### ***Scanning and image pre-processing***

Sections were scanned with a 20× objective using a Zeiss Axioscan Z1 scanner (Carl Zeiss MicroImaging, Jena, Germany) and loss less TIFF files exported from the Zen software (RRID:SCR\_013672). The TIFF images were renamed to reflect their serial order, and sections that had been horizontally flipped during mounting were mirrored. Images were downscaled to the lowest resolution giving satisfactory segmentation of cell bodies with the ilastik software (15 % and 10 % of their original width for parvalbumin and calbindin images, respectively). Mirroring, renaming and resizing steps were performed using the Transform function of the Nutil software (v.0.4.01, RRID:SCR\_017183; Groeneboom et al., 2020). Distortions and dislocation of individual tissue pieces introduced during processing and mounting were corrected using Adobe Photoshop. We moved and mirrored image parts to reconstruct normal section appearance. For parvalbumin sections, such corrections were applied to the original TIFF images. However, the calbindin TIFF images were too large to be opened in Adobe Photoshop or similar software, and correction of section parts were therefore only applied to the downscaled images.

## **DATA ANALYSIS**

We used the QuickNII-ilastik-Nutil (QUINT) workflow to extract and quantify labelled cells from microscopic images of calbindin- and parvalbumin stained sections (Yates et al., 2019). Through this workflow, images are spatially registered to atlas using QuickNII; objects-of-interest (in our case, cells) are segmented from the images using ilastik; and the segmented objects are quantified using Nutil. To extrapolate estimates for total numbers and volumetric densities, we further post-processed the QUINT results. Lastly, we performed a comparative analysis of parvalbumin neurons in the rat and mouse hippocampal region. The detailed methods of each step of the QUINT workflow, the post-processing of the results, and the comparative analysis is described below.

### ***Atlas registration***

Serial section images were spatially registered to common 3-D brain reference atlases using the QuickNII software v2.2 (RRID:SCR\_016854; Puchades et al., 2019), bundled with the Allen Mouse Common Coordinate Framework, version 3 of the template, 2017 edition of the delineations (Wang et al., 2020; here referred to as CCFv3-2017) and the Waxholm Space atlas of the Sprague-Dawley rat brain, version 1.01 of the template and version 2 of the delineations (Papp et al., 2014; Kjonigsen et al., 2015; here referred to as WHSv2). First, section images were registered using QuickNII to identify section positions and deviations from the standard planes. For coronally oriented sections, the anatomically distinct landmarks were the

genu of the corpus callosum, the crossing of the anterior commissure, and the rostral appearance of structures such as nucleus accumbens, caudoputamen, and dorsal hippocampus. The superior and inferior colliculus, as well as the inferior olive, provided important anatomical landmarks in more posteriorly located sections. For horizontally oriented sections, the registration was primarily based on the anterior commissure, the dorsal appearance of the hippocampus and caudoputamen, the olfactory bulb and the piriform cortex. A second researcher verified all registration results. The affine registration with QuickNII yielded custom atlas plates matching each section image. To further optimize registration, the custom atlas images were non-linearly transformed using the software tool VisuAlign v0.8 (RRID:SCR\_017978). We first focused on fitting the template to the outer edges of the section, and secondly adjusted it to refine the fit of major landmarks situated deeper in the brain (e.g. striatum, globus pallidus, hippocampus). The high-resolution microscopic images with their custom atlas overlay images are organized and disseminated to an interactive web-microscopy viewer via the Navigator N3 data system at the University of Oslo. A forerunner of this system is described by Moene et al. (2007).

### ***Image segmentation***

*Pixel classification with ilastik.* Images were segmented using the pixel classification pipeline in ilastik (RRID:SCR\_015246; v.1.3.3), which allows classification of features on a pixel level on a scale up to 10 by 10 pixels. We assigned two label classes termed “cell” and “background”. During segmentation, we placed labels throughout different regions and in all the training sections until the segmentation was deemed satisfactory. We trained one classifier per image series (i.e. one per animal). For each series, we used every fifth image for training and then applied the classifier to all images using the Batch Processing function in ilastik.

*Removal of artefacts and incorrectly segmented objects.* Overall, the classifiers produced by the pixel classification pipeline distinguished objects of interest from background with relatively high accuracy. Still, some artefacts and incorrectly segmented objects occurred. The ilastik software includes an object classification pipeline that allows for distinguishing artefacts, which is especially useful when these are very different from the objects of interest. However, in our material incorrectly segmented objects (e.g. neurites) resembled the objects of interest in size and shape. Therefore, we visually inspected all segmentation images to identify incorrectly segmented objects or artefacts, and removed these manually using NIH ImageJ. Most artefacts segmented as “cell” were seen around the edges of the sections and in relation to blood vessels and ventricles. Example images, segmentations and atlas overlays are shown in Supplemental Figure 4.

### ***Quantification of segmented objects***

We used Nutil Quantifier (v.0.4.02) to combine customized atlas maps from QuickNII (refined and exported using VisuAlign) with segmented images from ilastik. The pixel size cut-off function was used to exclude objects representing fragments or small artefacts; a cut-off of 4 pixels was chosen for both parvalbumin and calbindin datasets, based on visual inspection of segmented images.

The regions in the CCFv3-2017 are more fine-grained than the WHSv2. To achieve better correspondence with the granularity of the rat brain atlas, small regions and individual cellular layers in CCFv3-2017 were grouped into more coarse areas (e.g. primary motor cortex, CA1 of the hippocampus) using the “custom regions” feature of Nutil Quantifier. This reduction of granularity of atlas delineations was also motivated by the need to compensate for inaccuracies in the spatial registration of images to the common 3D atlas, which primarily impacts the precision of registration of small brain regions. Excel sheets indicating the organization of custom atlas regions are provided with the derived datasets and can be re-used in new analyses with Nutil Quantifier. Post-processing of numerical data (correction and extrapolation to whole regions and volumetric densities, described below) from mouse brains was performed on the numbers from these

aggregated custom regions. The numbers per individual region in the CCFv3-2017 were also extracted with Nutil Quantifier and included in the derived data files. The custom regions used in the present analyses are given in Figure 1.

### ***Post-processing of Nutil Quantifier results***

The output reports from Nutil contain the total number of segmented objects counted in every sampled section through each atlas region, given as counts per region, section, and region for the whole brain. These numbers represent all objects counted in all the images investigated. Additionally, damaged or missing parts of individual sections might influence results. To correct for the tissue sampling and missing tissue parts, we implemented a series of post-processing steps to extrapolate Nutil Quantifier numbers to reflect densities and total number estimates. First, we used the sectional reports to compile numbers per section for each region in a new spreadsheet. For all series, we manually inspected the quality and completeness of each section image. Whenever a part of the brain was damaged or missing in a section, or staining quality was deemed suboptimal, we identified which region(s) of the brain this affected. For every such instance, we replaced the Nutil Quantifier results according to the following rules. If a section showed damage or suboptimal staining on one side of the brain, we used the intact side as a reference and multiplied the number by two to get a bilateral estimate for the section. If a region was damaged or suboptimally stained on both sides, we used an average of numbers obtained from the adjacent neighbouring sections. The adjusted section-by-section numbers were summed per region of interest in a second spreadsheet. On average, 20 % of the sections in a series needed some form of correction, typically meaning that numbers for one or a few regions were corrected as described above. Exclusion of whole sections from the analysis were very rarely necessary, and never for more than 4 % of all the sections within a series. Details on whether corrections were made (and if so, which ones) are provided as metadata with each of the datasets.

Secondly, to adjust for double-counting in volumetric extrapolation, we calculated an estimate of total numbers of cells in each region by using Abercrombie's formula (Abercrombie, 1946):

$$N = \frac{n \times T}{T + D}$$

Where N is the cell number, n is the number of counted profiles, T is the thickness of the sections, and D is the mean diameter of the profiles. The mean cell diameter was calculated by multiplying the average object area for all cells (generated by Nutil Quantifier) by the pixel scale of the images, and using this area (A) to calculate the diameter (D):

$$D = 2 \times \frac{A}{\pi}$$

The pixel scales for the section images used in ilastik were 8.6 pixels per  $\mu\text{m}^2$  for rat and mouse parvalbumin section images, and 4.8 pixels per  $\mu\text{m}^2$  for the mouse calbindin section images. The estimated diameter of the cells used in our calculations were 11.3 and 12.7  $\mu\text{m}$  for mouse and rat parvalbumin neurons, respectively, and 7.9  $\mu\text{m}$  for mouse calbindin neurons. Lastly, we multiplied the resulting number with the section sampling fraction (4 for parvalbumin datasets, 6 for calbindin datasets) to estimate the total number of cells per region.

To estimate volumetric densities, we divided the total number of cells for each region with the volumes of each atlas region, exported from the ITK-snap software using the "Volumes and statistics" function. The .xlsx files included in the derived datasets, published on EBRAINS.eu, contain all the raw and corrected numbers, as well as the region volumes used for calculations. The volumetric densities estimated here were compared against those reported by Kim et al. (2017) and others in the literature (see section on "Comparison of findings with data from previous reports" below).



### ***Comparative analysis of parvalbumin neurons***

To compare the total number and density of parvalbumin neurons in the mouse and rat hippocampal region, hippocampal data from regions in the CCFv3-2017 were grouped to correspond with rat brain regions defined in the WHSv2 rat brain atlas. Most areas of the hippocampal region were highly comparable between the atlases, in terms of nomenclature, anatomical position and shape of the regions (Figure 6). The regions of Ammon's horn and the dentate gyrus were highly similar. The prosubiculum of the CCFv3-2017, intercalated between the subiculum and the CA1, was grouped as part of the subiculum, while the postsubiculum was included in the presubiculum, as this term is commonly used to refer to the dorsal presubiculum (Taube, 2007; Taube et al., 1990). The perirhinal and entorhinal cortices in the CCFv3-2017 was considered to correspond to WHSv2 perirhinal area 35 and 36, respectively. Lastly, the postrhinal cortex (POR), was present in both the CCF and WHSv2, but with a much narrower dorsoventral extent in the CCFv3-2017 than the WHSv2. In the WHSv2, the POR lines the caudal pole of the lateral and medial entorhinal cortex dorsally; in the CCFv3-2017, however, the POR does not extend to the most caudal part of the cortex. At this level, a cortical region termed the posterolateral visual area is included in the CCFv3-2017. Anatomically, the combined postrhinal and posterolateral visual area in the CCFv3-2017 resemble the POR in the WHSv2. We therefore included both of these in the postrhinal cortex for our comparative analysis. Figure 6 shows hippocampal regions in the two atlases and the mapping of CCFv3-2017 to WHSv2 regions.

*Spatial distribution analysis.* To explore and compare possible topographical distribution gradients of parvalbumin neurons in the mouse and rat parahippocampal region, we averaged the section-by-section density of parvalbumin neurons across animals and assessed whether densities of parvalbumin stained neurons changed along the dorsoventral axis of each subregion. To get numbers that could be compared for each level, we calculated volumetric densities per section as follows. First, we calculated corrected numbers of cells for each atlas region per section by applying Abercrombie's formula to the section-wise numbers. Then, for each atlas region, we multiplied the region area in pixels (extracted from Nutil Quantifier reports) by the pixel scale (see above). For each section, we then divided the corrected number of cells per region by the region area, and divided this by the section thickness (Keller et al., 2018) to get the volumetric density:

$$vN = \frac{n}{T}$$

Where  $vN$  is the volumetric density,  $n$  is the corrected two-dimensional cell count, and  $T$  is the thickness of the section. This gave the density per  $\mu\text{m}^3$ ; lastly, to get numbers per  $\text{mm}^3$ , we therefore multiplied these by  $10^9$ .

We next sorted sections according to their dorsoventral level for each animal, and averaged the density of neurons per level across animals. Each subregion was then represented in a spreadsheet as a row containing the average parvalbumin neuron density for each dorsoventral level (one column per level). We applied conditional formatting to each row so each cell was colour-coded in a gradient according to its value, with the lowest number for each row coded light yellow and the highest number coded dark orange. These colour-coded rows were inspected for cases of clear dorsoventral gradients and copied to Adobe Illustrator to be shown in figures (see Results).

## METHOD VALIDATION

### *Comparison of findings with previous reports*

Kim and colleagues (2017) mapped parvalbumin interneurons across the whole mouse brain using transgenic mice and image segmentation based on convolutional neural networks. They shared all the total number and density estimates through their publication, which we downloaded and used for comparison. They used a custom-built three-dimensional version of the original (two-dimensional) Allen Reference Atlas of the mouse brain (Dong, 2008). The nomenclature used for this version is similar, but not identical, to the one in the version we used in our analysis (CCFv3-2017). We therefore mapped the results found in their files to the custom regions used in our analysis (see above). Kim et al. (2017) reported values for both male and female mice, and reported that several subcortical structures are sexually dimorphic. Given this finding, and the fact that our mouse parvalbumin data were obtained from males, we used only the results from their male subjects ( $n = 5$ ) for comparison to our results ( $n = 4$ ).

We also queried the literature to find estimates of the same cell types as those quantified here. To this end, we searched for 1) the RRIIDs and catalogue numbers of the antibodies used in our study (using Google Scholar) and 2) articles that mentioned both stereology and “parvalbumin” or “calbindin” in the title or abstract (using PubMed). For each search, all results were screened manually and included if they presented relevant data (total number or density estimate of parvalbumin or calbindin cells in rats or mice).

The following searches were performed:

1. Google Scholar search for RRID:AB\_2631173. Performed 14.04.2020; 31 results, 2 included.
2. Google Scholar search for RRID:AB\_477329. Performed 20.04.2020; 81 results, none included.
3. Google Scholar search for RRID:AB\_10000347. Performed 21.04.2020; 87 results, none included.
4. Google Scholar search for ((rat OR (mouse)) AND (Swant PV27) AND (stereology OR stereological)). Performed 14.04.2020; 18 results, 1 included.
5. Google Scholar search for ((rat OR (mouse)) AND (PARV-19) AND (stereology OR stereological)). Performed 20.04.2020; 61 results, 2 included.
6. Google Scholar search for ((rat OR (mouse)) AND (“Swant 300”) AND (stereology OR stereological)). Performed 21.04.2020; 21 results, none included.
7. PubMed (via Ovid Medline) search for: (rat or mouse or rodent).tw,kf AND stereolog\*.tw,kf. AND parvalbumin.tw,kf. Performed 14.04.2020; 59 results, 14 included.
8. PubMed (via Ovid Medline) search for: (rat or mouse or rodent).tw,kf AND stereolog\*.tw,kf. AND calbindin\*.tw,kf. Performed 21.04.2020; 38 results, 3 included

We supplemented this search with references from a recent review of number estimates in the mouse brain (Keller et al., 2018) and from our previously published database of literature-derived quantitative estimates in the basal ganglia (Bjerke et al., 2019, 2020)

### ***Validity of segmentations***

The results obtained with the QUINT workflow were benchmarked against prior manual counts from both parvalbumin and calbindin stained material that were used as a guide during the segmentation process. Manual counting was performed on a subset of the material by annotating each labelled cell in Adobe Photoshop (RRID:SCR\_014199). The annotated cells were subsequently quantified using Nutil, as described above. Manual counting was performed for each section throughout the calbindin stained anterior cingulate cortex (sections s103 – s175 from mouse 10), the parvalbumin stained entorhinal cortex (s019 – s044 from rat 25205), and for one whole hemisphere from each of the stains (s151 from mouse10 and s028 from rat 25205). The regions of interest were defined by the QuickNII atlas maps for the evaluated sections and were thus identical for the quantification of manual and ilastik segmentations.

### ***Reliability of segmentations***

We assessed both intra- and interrater reliability by segmenting material from one of the series (parvalbumin stained sections from rat 25205) several times. Intrarater reliability was assessed by one researcher segmenting the same material three times. The first and second segmentation was performed within the same week, while the last one was done six weeks later.

In a pilot study of interrater reliability, we considered the reliability of segmentations obtained by three researchers using the same material, but without clear guidelines for what to consider a labelled cell. We observed, both qualitatively and quantitatively, that results varied considerably between the three researchers. We therefore set out to do a more systematic assessment of interrater reliability, with clear instructions on how to perform the segmentation with ilastik. One researcher performed an initial segmentation and wrote instructions for its replication. The same materials and instructions were then presented to five other researchers for segmentation. The instructions gave a description of objects considered to be cells and example images of segmentation results. In addition, information was given on how to train the ilastik classifier, with instruction to not label pixels in oversaturated areas (specifically, the cerebellum and reticular nucleus of thalamus). Researchers were also given access to the segmentations overlaid on the original (high-resolution) images via an online viewer system, and were instructed to use these actively to verify similarity of segmentations. The full instructions as given to the researchers is included in the section below. Each researcher then ran their classifier on the full set of images from rat 25205. Objects in the resulting segmented images were quantified using Nutil quantifier, as described above.

### ***Documentation for segmentation of parvalbumin cells in rat 25205***

#### **Instructions provided to researchers:**

**Goal.** The goal of this exercise is to reproduce a segmentation (“target segmentation”) made by one researcher as faithfully as possible. The original segmentation was made with the aim of extracting parvalbumin positive cell bodies from DAB-stained images. The cells are generally easy to recognize, but there are variations across the material that makes some profiles more difficult to determine. In the more difficult cases, researchers might have different opinions on what should be considered a cell. I have aimed to provide the sufficient and necessary documentation with respect to what I have considered a cell when segmenting this material. It is important that you consider the provided examples and attempt to replicate this, regardless of whether you agree with the definitions and segmentations made here.

**Training images.** The training material includes every fifth section throughout the series, starting with s003 and ending with s053. Images are 15 % of original tiff resolution (with original tiffs being 50 % of original CZI file).

**Cell criteria.** A combined evaluation of the following criteria was used to decide whether an object is a cell or not:

- clearly distinguished from the background
- round, ovoid, triangular, or multipolar in shape
- medium, darkly, or intensely stained
- size substantial enough to support that the object is a cell and not axonal or dendritic fragments

See “Examples of manually annotated cells” below for examples.

**Training in ilastik.** Certain areas are so heavily labelled or contains so much stained neuropil that they should be excluded from the brain-wide analysis so as not to compromise the quality of the remaining classifier. For this reason, do not segment pixels in the cerebellum or reticular nucleus of the thalamus. Before starting, see the examples of manual annotations and target segmentations in the end of this document. High-resolution images with target segmentations overlaid are available via the Navigator3 system, and can be used as a reference during segmentation.

- 1) Select all features
- 2) Create two labels: cells and background
- 3) Use the thinnest brush stroke (1 px)
- 4) Label some clear examples of cells, and label directly adjacent pixels as background.

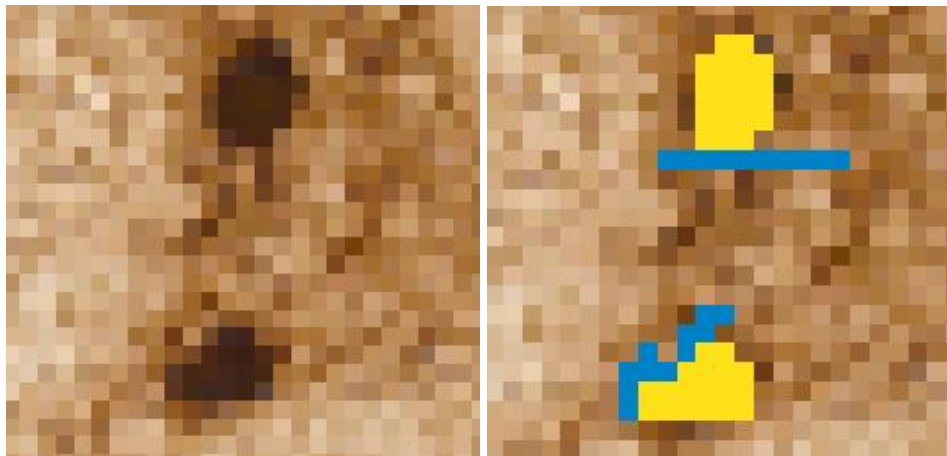

Step 2 illustration

- 5) Label some cells that are closely placed, and label the area between them as background
- 6) Place some background labels in appropriate areas, especially in regions with a lot of stained neuropil and around ventricles where staining is strong but not representing cells.

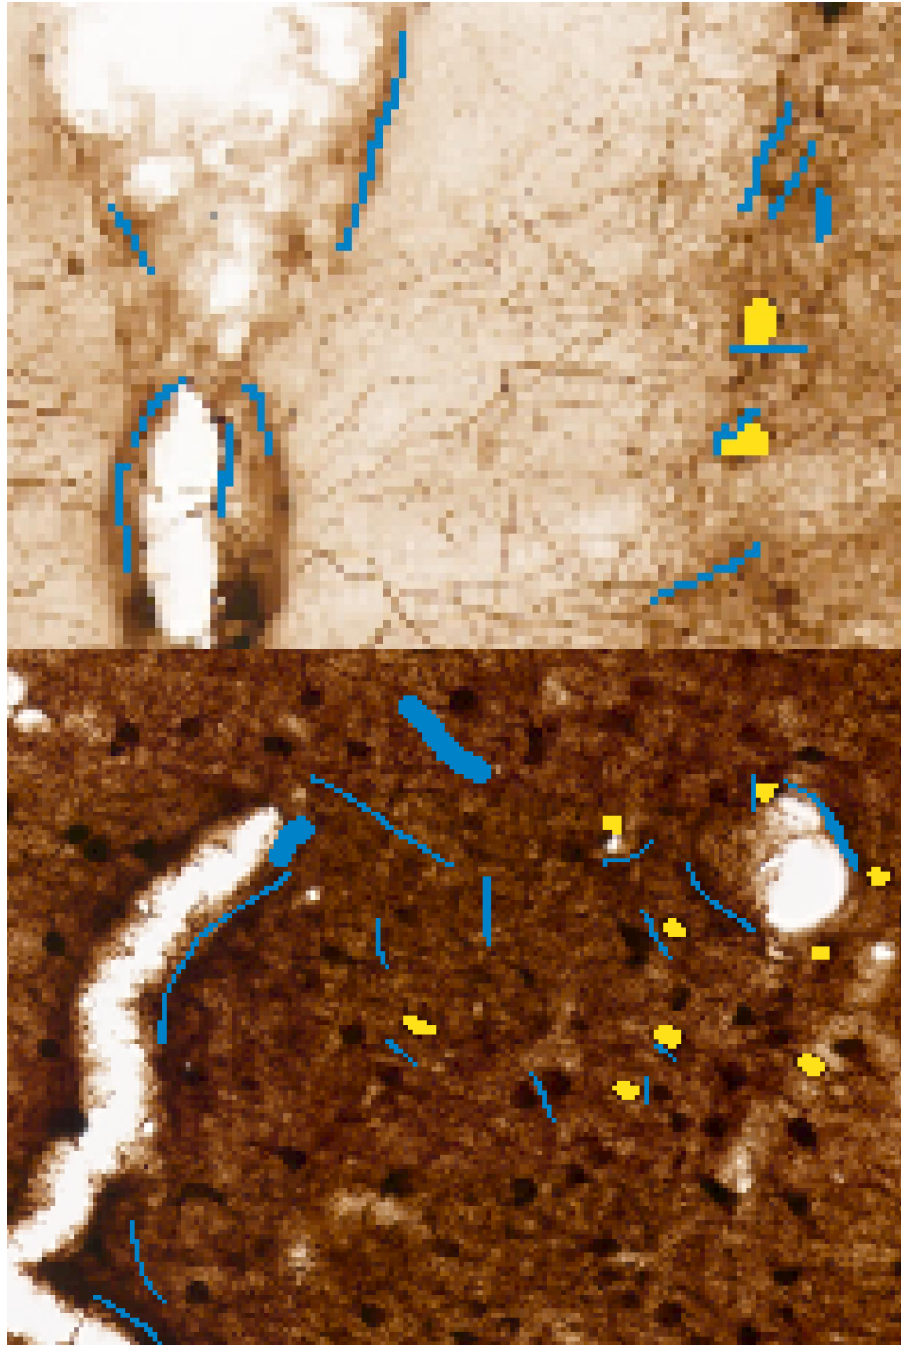

Step 3-4 illustration

- 7) Make sure to do steps 3-5 for areas of different intensities and across anatomical regions (cortex, hippocampus, striatum) and training sections. Use a bigger (5 or 7 px) brush to label more extensive areas of background.
- 8) Use live update and toggle the uncertainty filter to identify objects for which the classifier needs further input
- 9) Label cells for which the classifier is uncertain until the uncertainty is restricted to haloes surrounding cells, i.e. until there is little uncertainty in the center of the objects. Make sure to label areas of background at the same time.

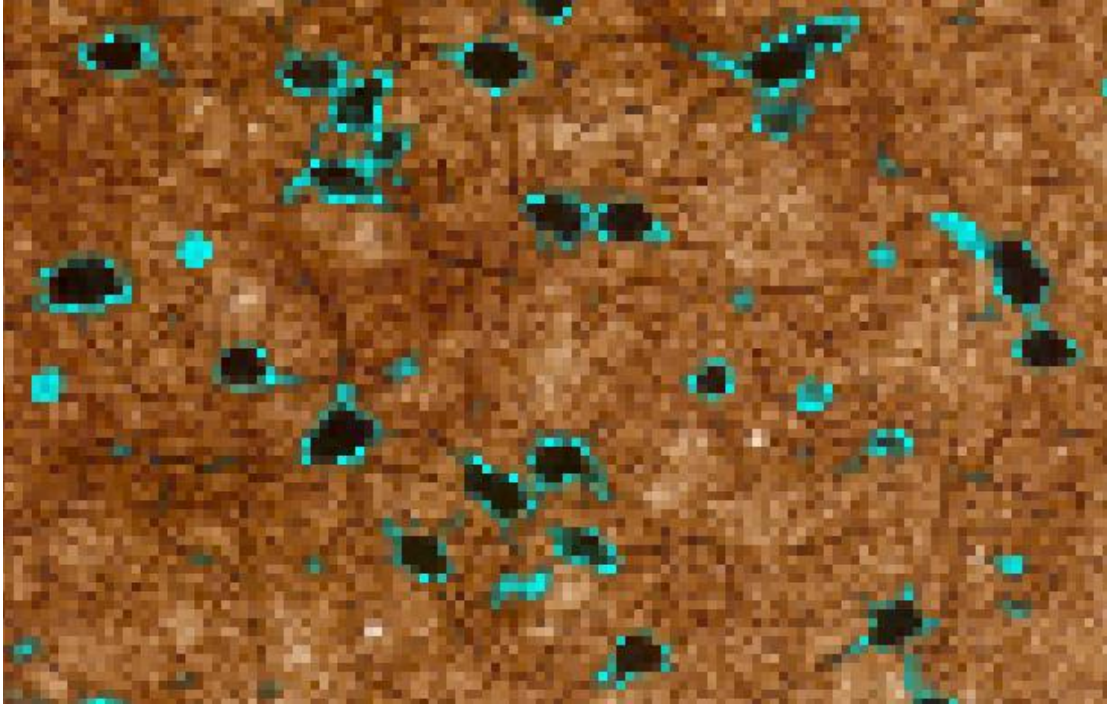

Uncertainty filter applied. Cells are recognized with confidence, despite uncertainty at their edges.

- 10) Repeat step 8 across all training images, and make sure to visit representative areas (including cortex, striatum, hippocampus, globus pallidus, basal forebrain, olfactory bulb).
- 11) See target segmentation images in Navigator to evaluate whether results are satisfactory. Go through all training images with reference to the segmented training images. If you have a lot of undesired pixels segmented as cells, label more background pixels. Note that a pixel size filter of 4 pixels will be applied to the segmentations, so fragments smaller than this will not affect the results.

### Examples of manually annotated cells

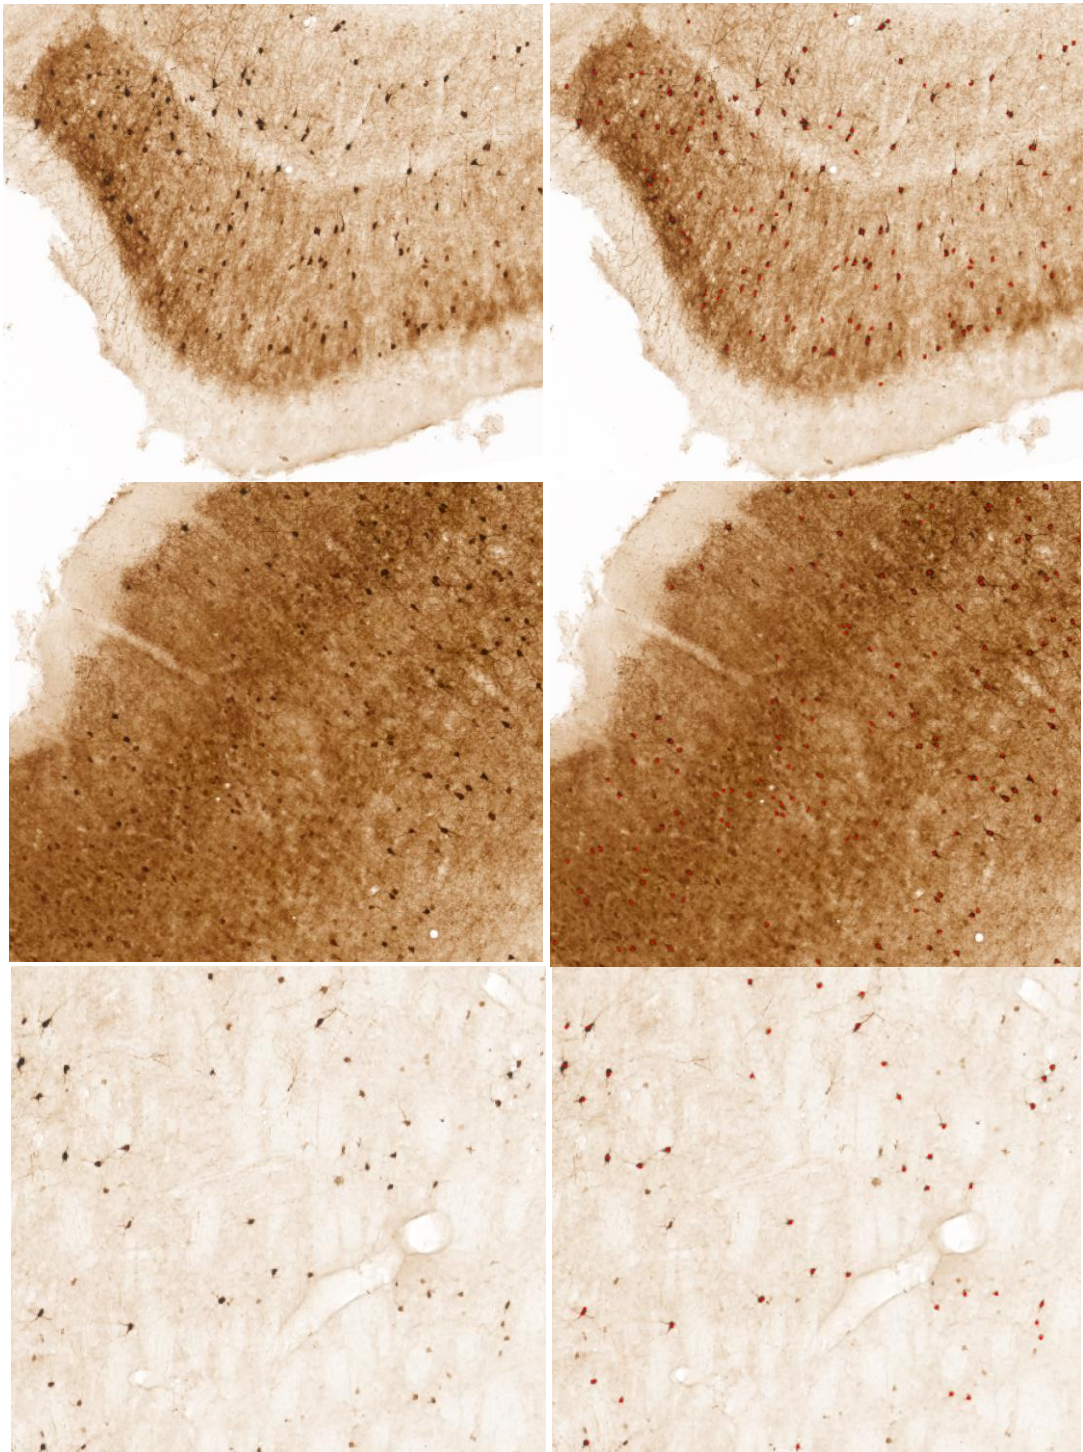

Examples images (left) and the same images with manually annotated cells. The examples are from medial entorhinal cortex (upper), neocortex (middle) and striatum (lower) from s028 of the training images. Very lightly stained objects, or objects that do not have a clear cell shaped outline easily distinguished from background staining, are here not considered to represent cell profiles.

Examples of target segmentation results

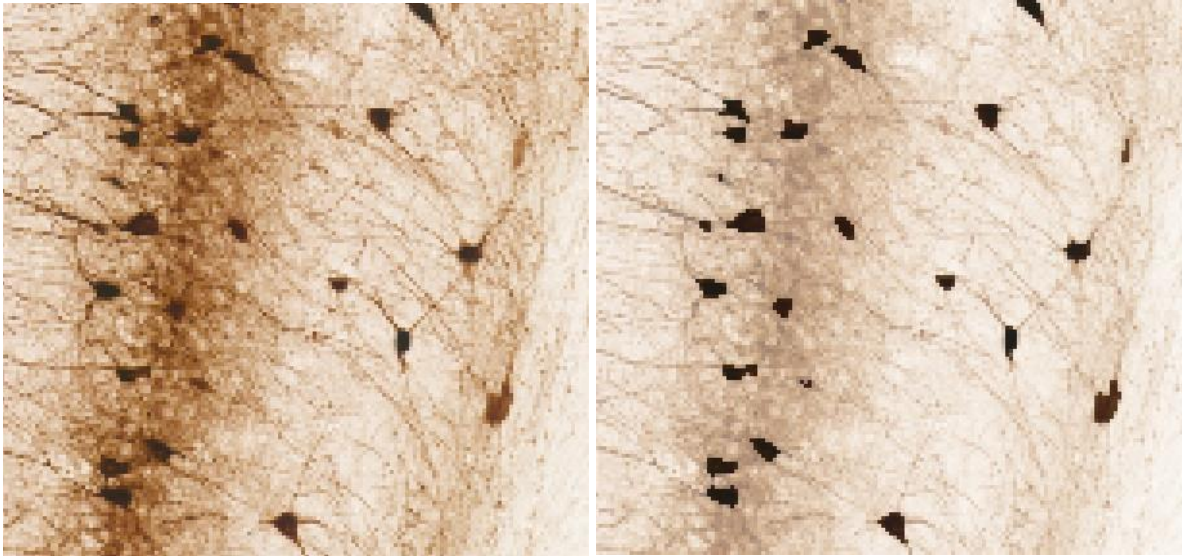

Hippocampus, s014

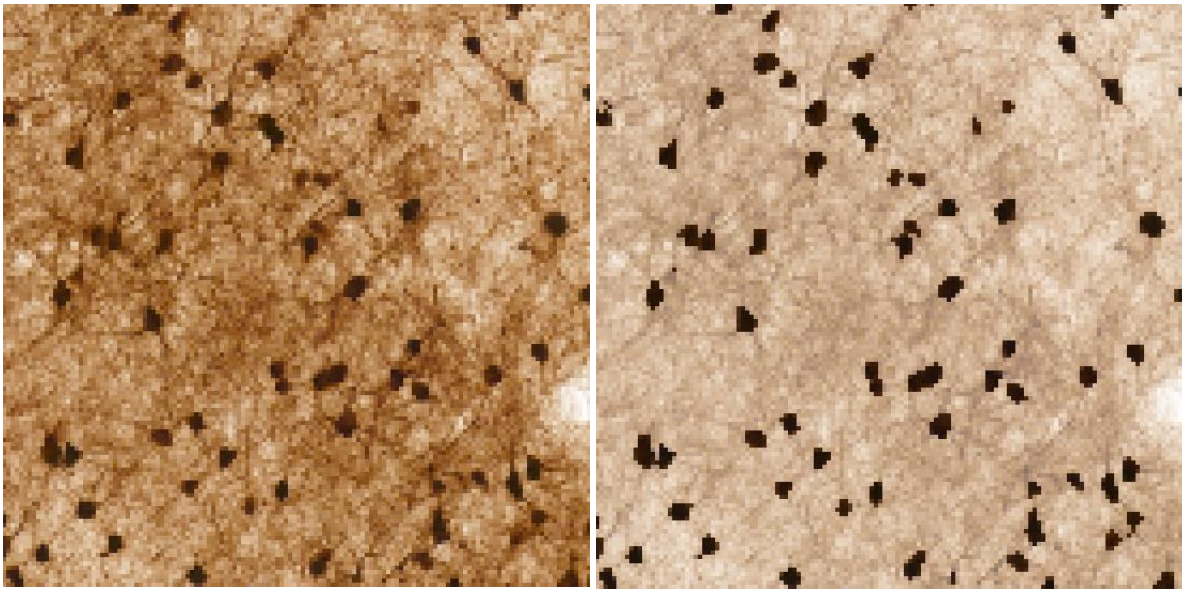

Cortex, s014



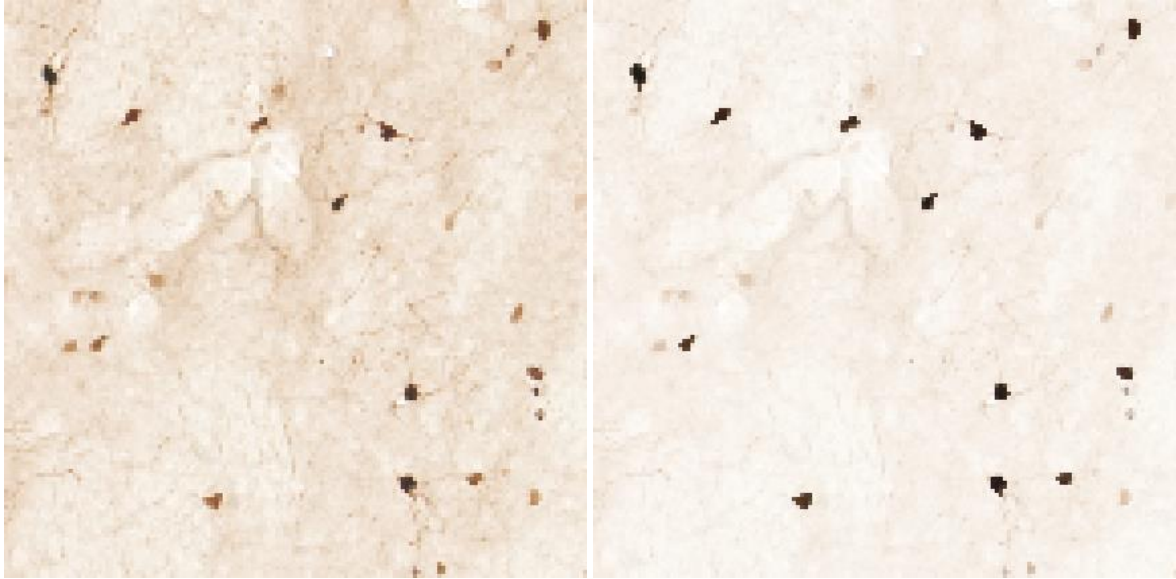

Caudoputamen, s025

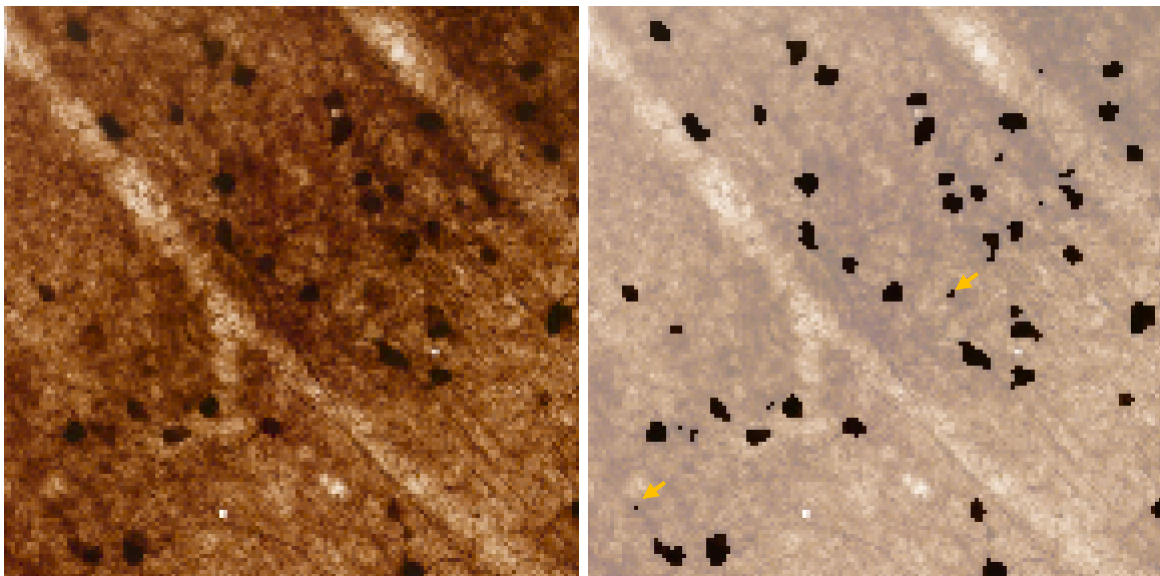

Cortex, s025. Yellow arrows point to examples of fragments that will be filtered out later based on size and thus will not affect count results.

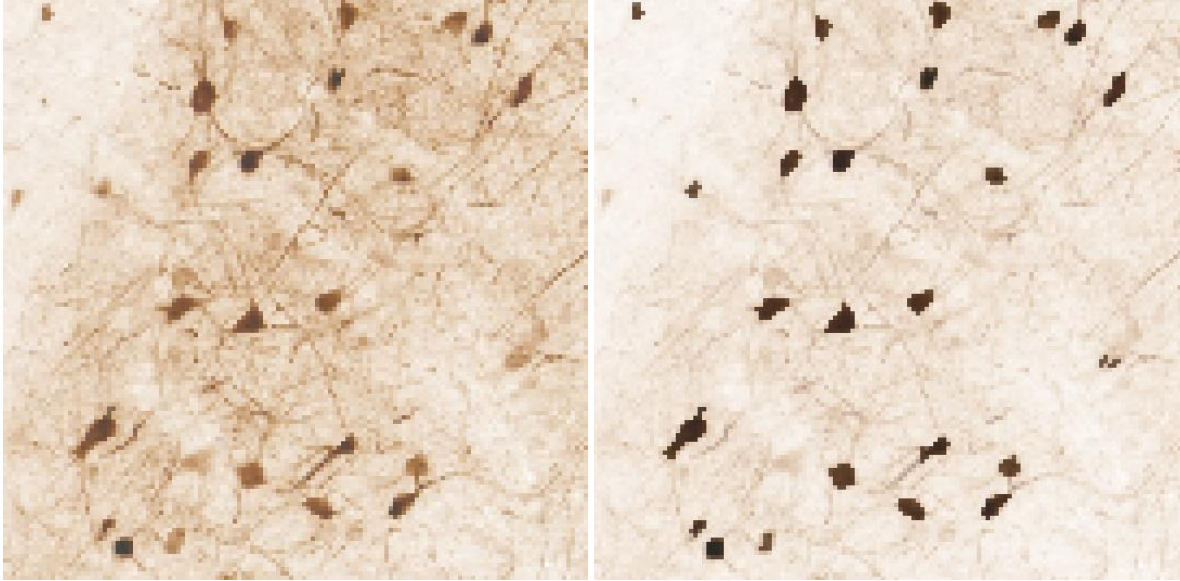

Globus pallidus, s038

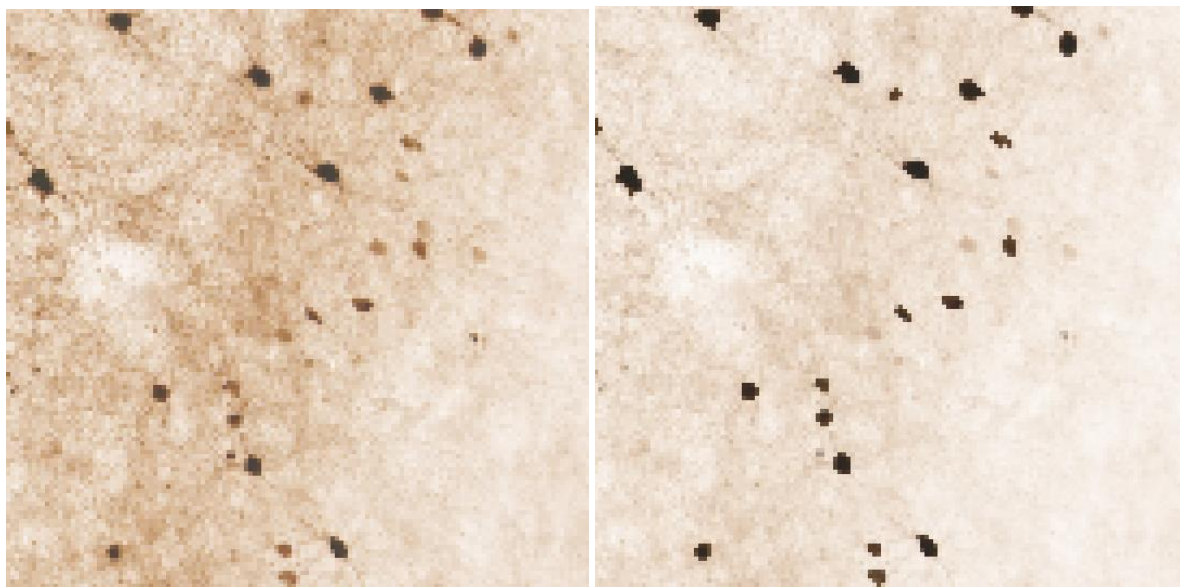

Cortex, s038

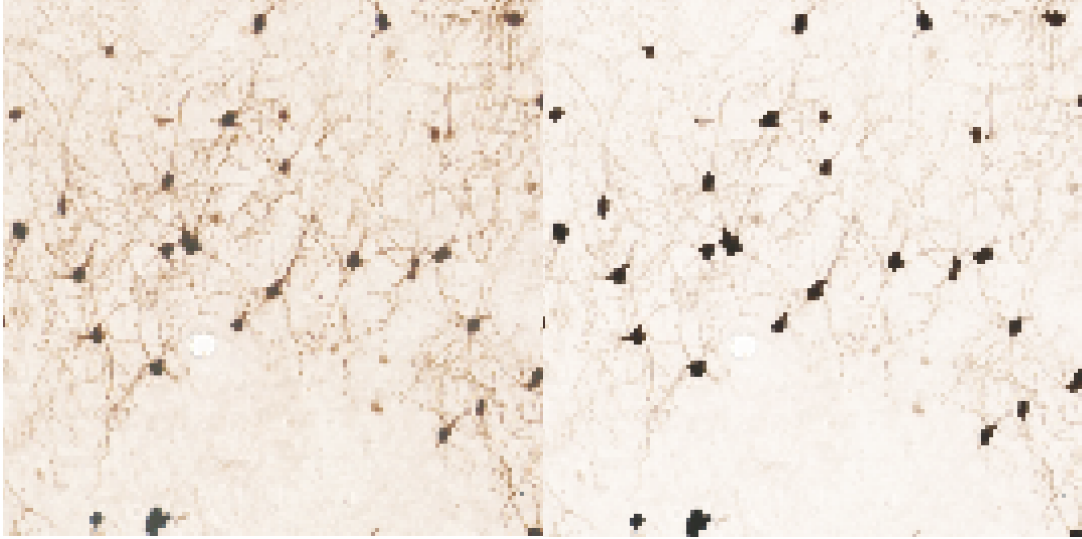

Olfactory bulb, s038

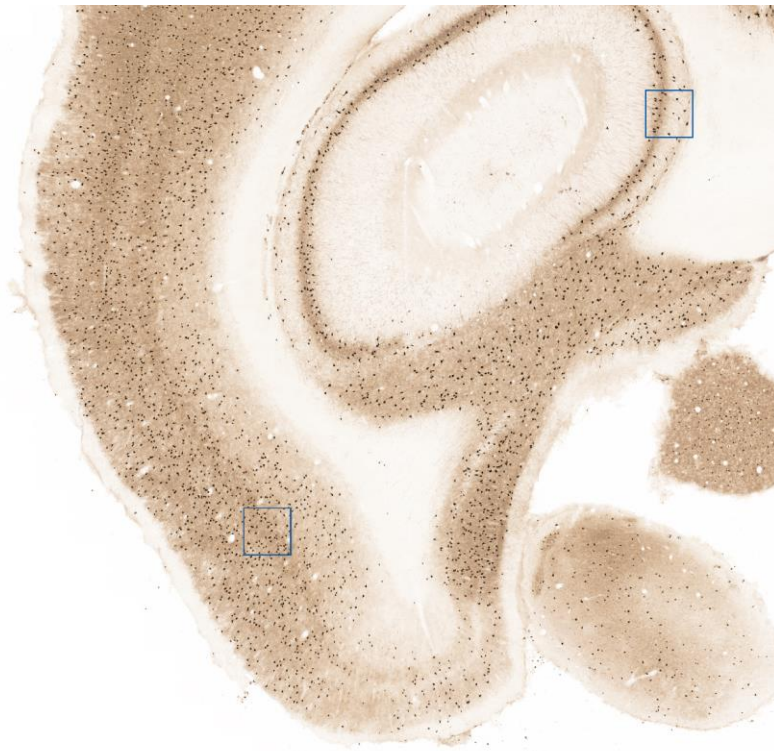

Hippocampus and cortex parts shown in examples above, s014

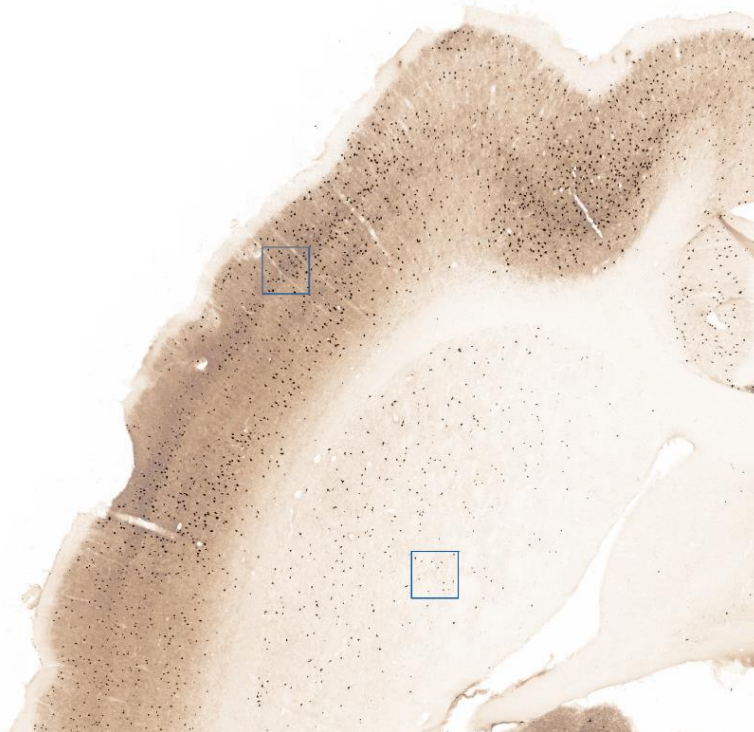

Caudoputamen and cortex parts shown in examples above, s025

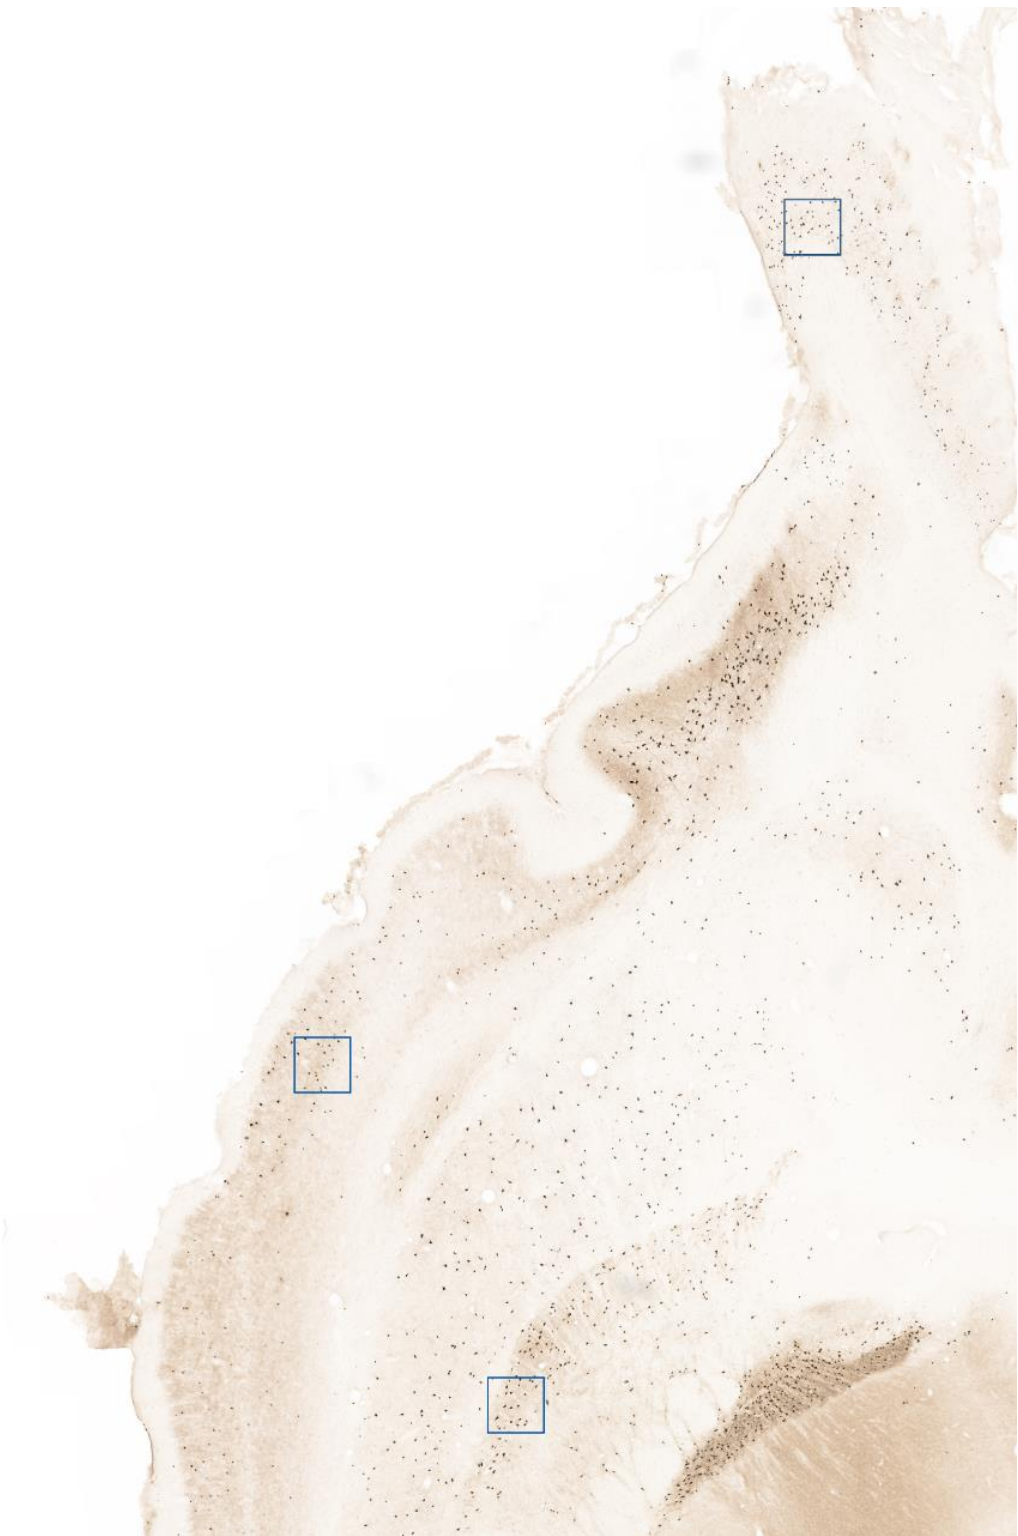

Globus pallidus, cortex, and olfactory bulb parts shown in examples above, s038

## QUANTIFICATION AND STATISTICAL ANALYSIS

Quantitative data throughout this paper are reported as mean  $\pm$  SEM. Summary statistics were extracted using Microsoft Excel (RRID:SCR\_016137). Exact values of n, representing the number of animals, are given in the result section.

## Supplemental references

- Aika, Y., Ren, J.Q., Kosaka, K., and Kosaka, T. (1994). Quantitative analysis of GABA-like-immunoreactive and parvalbumin-containing neurons in the CA1 region of the rat hippocampus using a stereological method, the disector. *Exp. Brain Res.* *99*, 267–276.
- Barinka, F., Salaj, M., Rybář, J., Krajčovičová, E., Kubová, H., and Druga, R. (2012). Calretinin, parvalbumin and calbindin immunoreactive interneurons in perirhinal cortex and temporal area Te3V of the rat brain: Qualitative and quantitative analyses. *Brain Res.* *1436*, 68–80.
- Bjerke, I., Puchades, M., Bjaalie, J., and Leergaard, T. (2019). Database of quantitative cellular and subcellular morphological properties from rat and mouse basal ganglia (Human Brain Project Neuroinformatics Platform).
- Kaalund, S.S., Riise, J., Broberg, B. V., Fabricius, K., Karlsen, A.S., Secher, T., Plath, N., and Pakkenberg, B. (2013). Differential expression of parvalbumin in neonatal phencyclidine-treated rats and socially isolated rats. *J. Neurochem.* *124*, 548–557.
- Kägi, U., Berchtold, M.W., and Heizmann, C.W. (1987) Ca<sup>2+</sup>-binding parvalbumin in rat testis. Characterization, localization, and expression during development. *J. Biol. Chem.*, *262*(15), 7314-7320.
- Megahed, T., Hattiangady, B., Shuai, B., and Shetty, A.K. (2015). Parvalbumin and neuropeptide Y expressing hippocampal GABA-ergic inhibitory interneuron numbers decline in a model of Gulf War illness. *Front. Cell. Neurosci.* *8*, 1–12.
- Moene, I.A., Subramaniam, S., Darin, D., Leergaard, T.B., and Bjaalie, J.G. (2007). Toward a workbench for rodent brain image data: Systems architecture and design. *Neuroinformatics*.
- Pinol, M.R., Kägi, U., Heizmann, C.W., Vogel, B., Sequier, J.M., Haas, W., Hunziker. (1990) Poly- and monoclonal antibodies against recombinant rat brain calbindin D-28 K were produced to map its selective distribution in the central nervous system. *J. Neurochem.* *54*(6), 1827-1833.
- Sanchez-Mejias, E., Nuñez-Diaz, C., Sanchez-Varo, R., Gomez-Arboledas, A., Garcia-Leon, J.A., Fernandez-Valenzuela, J.J., Mejias-Ortega, M., Trujillo-Estrada, L., Baglietto-Vargas, D., Moreno-Gonzalez, I., et al. (2020). Distinct disease-sensitive GABAergic neurons in the perirhinal cortex of Alzheimer's mice and patients. *Brain Pathol.* *30*, 345–363.
- Shiraki, A., Tanaka, T., Watanabe, Y., Saito, F., Akahori, Y., Imatanaka, N., Yoshida, T., and Shibutani, M. (2016). Immunohistochemistry of aberrant neuronal development induced by 6-propyl-2-thiouracil in rats. *Toxicol. Lett.* *261*, 59–71.
- Taube, J. (2007). The head direction signal: Origins and sensory-motor integration. *Annu. Rev. Neurosci.* *30*, 181–207.
- Taube, J.S., Muller, R.U., and Ranck, J.B. (1990). Head-direction cells recorded from the postsubiculum in freely moving rats. II. Effects of environmental manipulations. *J. Neurosci.* *10*, 436–447.
- Trujillo-Estrada, L., Dávila, J.C., Sánchez-Mejias, E., Sánchez-Varo, R., Gomez-Arboledas, A., Vizuete, M., Vitorica, J., and Gutiérrez, A. (2014). Early neuronal loss and axonal/presynaptic damage is associated with accelerated amyloid- $\beta$  accumulation in A $\beta$ PP/PS1 Alzheimer's disease mice subiculum. *J. Alzheimer's Dis.* *42*, 521–541.
- Wang, C.Z., Yang, S.F., Xia, Y., and Johnson, K.M. (2008). Postnatal phencyclidine administration selectively reduces adult cortical parvalbumin-containing interneurons. *Neuropsychopharmacology* *33*, 2442–2455.
